# Supplementary material for: Chinese Neonatal Network: a national protocol for collaborative research and quality improvement in neonatal care
Source: PubMed Central journal article supplement — BMJ Open. 2022 May 2;12(5):e051175. doi: 10.1136/bmjopen-2021-051175 (PMC9062799; doi:10.1136/bmjopen-2021-051175), 2022-05-02
Supplement: bmjopen-2021-051175.draft_revisions.pdf [file bmjopen-2021-051175.draft_revisions.pdf]

# BMJ Open

BMJ Open is committed to open peer review. As part of this commitment we make the peer review history of every article we publish publicly available.

When an article is published we post the peer reviewers' comments and the authors' responses online. We also post the versions of the paper that were used during peer review. These are the versions that the peer review comments apply to.

The versions of the paper that follow are the versions that were submitted during the peer review process. They are not the versions of record or the final published versions. They should not be cited or distributed as the published version of this manuscript.

BMJ Open is an open access journal and the full, final, typeset and author-corrected version of record of the manuscript is available on our site with no access controls, subscription charges or pay-per-view fees (<http://bmjopen.bmj.com>).

If you have any questions on BMJ Open's open peer review process please email [info.bmjopen@bmj.com](mailto:info.bmjopen@bmj.com)

# BMJ Open

## The Chinese Neonatal Network: a national protocol for collaborative research and quality improvement in neonatal care

|                               |                                                                                                                                                                                                                                                                                                                                                                                                                                                                                                                                                                                                                                                                                                                                                                                                                                                                                                                                                                                                                                                                                                                                                                                                                                                                                                                                                                                                                                                                                                                                                                                                                                                                                                                        |
|-------------------------------|------------------------------------------------------------------------------------------------------------------------------------------------------------------------------------------------------------------------------------------------------------------------------------------------------------------------------------------------------------------------------------------------------------------------------------------------------------------------------------------------------------------------------------------------------------------------------------------------------------------------------------------------------------------------------------------------------------------------------------------------------------------------------------------------------------------------------------------------------------------------------------------------------------------------------------------------------------------------------------------------------------------------------------------------------------------------------------------------------------------------------------------------------------------------------------------------------------------------------------------------------------------------------------------------------------------------------------------------------------------------------------------------------------------------------------------------------------------------------------------------------------------------------------------------------------------------------------------------------------------------------------------------------------------------------------------------------------------------|
| Journal:                      | <i>BMJ Open</i>                                                                                                                                                                                                                                                                                                                                                                                                                                                                                                                                                                                                                                                                                                                                                                                                                                                                                                                                                                                                                                                                                                                                                                                                                                                                                                                                                                                                                                                                                                                                                                                                                                                                                                        |
| Manuscript ID                 | bmjopen-2021-051175                                                                                                                                                                                                                                                                                                                                                                                                                                                                                                                                                                                                                                                                                                                                                                                                                                                                                                                                                                                                                                                                                                                                                                                                                                                                                                                                                                                                                                                                                                                                                                                                                                                                                                    |
| Article Type:                 | Protocol                                                                                                                                                                                                                                                                                                                                                                                                                                                                                                                                                                                                                                                                                                                                                                                                                                                                                                                                                                                                                                                                                                                                                                                                                                                                                                                                                                                                                                                                                                                                                                                                                                                                                                               |
| Date Submitted by the Author: | 15-Mar-2021                                                                                                                                                                                                                                                                                                                                                                                                                                                                                                                                                                                                                                                                                                                                                                                                                                                                                                                                                                                                                                                                                                                                                                                                                                                                                                                                                                                                                                                                                                                                                                                                                                                                                                            |
| Complete List of Authors:     | <p>Hei, Mingyan; Beijing Children's Hospital Capital Medical University, Neonatal Center; National Center for Children's Health, Neonatal Center<br/>         Li, Xiaoying; Qilu Children's Hospital of Shandong University<br/>         Shi, Yuan; Children's Hospital of Chongqing Medical University, Department of Neonatology<br/>         Cao, Yun; Children's Hospital of Fudan University, Neonatology<br/>         Sun, Jianhua; Shanghai Children's Medical Center, Shanghai Jiao Tong University School of Medicine<br/>         Wu, Hui; The First Bethune Hospital of Jilin University, Neonatology<br/>         Jiang, Siyuan; Children's Hospital of Fudan University<br/>         Ma, Xiaolu; The Children's Hospital Zhejiang University School of Medicine, Neonatology<br/>         Wang, Yanchen; Children's Hospital of Fudan University<br/>         Sun, Huiqing; Children's Hospital Affiliated to Zhengzhou University, Division of Neonatology; Children's Hospital of Henan Zhengzhou<br/>         Zhang, Huayan; Guangzhou Women and Children's Medical Center, Division of Neonatology and Center for Newborn Care; Children's Hospital of Philadelphia and University of Pennsylvania Perelman School of Medicine, Department of Pediatrics<br/>         Du, Li-Zhong ; The Children's Hospital Zhejiang University School of Medicine<br/>         Zhou, Wenhao; Children's Hospital of Fudan University<br/>         Lee, Shoo; University of Toronto, Department of Pediatrics; University of Toronto, Department of Obstetrics and Gynecology and Dalla Lana School of Public Health<br/>         Chen, Chao; Children's Hospital of Fudan University, Department of Neonatology</p> |
| Keywords:                     | NEONATOLOGY, Protocols & guidelines < HEALTH SERVICES ADMINISTRATION & MANAGEMENT, Neonatal intensive & critical care < INTENSIVE & CRITICAL CARE, PERINATOLOGY, QUALITATIVE RESEARCH                                                                                                                                                                                                                                                                                                                                                                                                                                                                                                                                                                                                                                                                                                                                                                                                                                                                                                                                                                                                                                                                                                                                                                                                                                                                                                                                                                                                                                                                                                                                  |
|                               |                                                                                                                                                                                                                                                                                                                                                                                                                                                                                                                                                                                                                                                                                                                                                                                                                                                                                                                                                                                                                                                                                                                                                                                                                                                                                                                                                                                                                                                                                                                                                                                                                                                                                                                        |

SCHOLARONE™  
Manuscripts

1  
2  
3  
4  
5  
6  
7  
8  
9  
10  
11  
12  
13  
14  
15  
16  
17  
18  
19  
20  
21  
22  
23  
24  
25  
26  
27  
28  
29  
30  
31  
32  
33  
34  
35  
36  
37  
38  
39  
40  
41  
42  
43  
44  
45  
46  
47  
48  
49  
50  
51  
52  
53  
54  
55  
56  
57  
58  
59  
60

## TITLE PAGE

### Title:

The Chinese Neonatal Network: a national protocol for collaborative research and quality improvement in neonatal care

### Running title:

Protocol for CHNN collaborative research in China

### Authors and affiliations:

Mingyan Hei<sup>1</sup>, MD, PhD; Xiaoying Li<sup>2</sup>, MD, PhD; Yuan Shi<sup>3</sup>, MD, PhD; Yun Cao<sup>4</sup>, MD, PhD; Jianhua Sun<sup>5</sup>, MD; Hui Wu<sup>6</sup>, MD; Siyuan Jiang<sup>4</sup>, MD, PhD; Xiaolu Ma<sup>7</sup>, MD; Yanchen Wang<sup>4</sup>, MSC ; Huiqing Sun<sup>8</sup>, MD, PhD; Huayan Zhang<sup>9,10</sup>, MD; Lizhong Du<sup>7</sup>, MD, PhD; Wenhao Zhou<sup>4</sup>, MD, PhD; Shoo K Lee<sup>11,12</sup>, FRCPC; Chao Chen<sup>4</sup>, MD, PhD; on behalf of the Chinese Neonatal Network (CHNN)\*

(\* A full list of the CHNN Investigators is provided in the Group Information)

<sup>1</sup>Neonatal Center, Beijing Children's Hospital, Capital Medical University, Beijing China

<sup>2</sup>Department of Neonatology, Qilu Children's Hospital of Shandong University, Jinan, Shandong, China

<sup>3</sup>Department of Neonatology, Children's Hospital of Chongqing Medical University, Chongqing, China

<sup>4</sup>Department of Neonatology, Children's Hospital of Fudan University, Shanghai, China

<sup>5</sup> Department of Neonatology, Shanghai Children's Medical Center, Shanghai Jiao Tong University School of Medicine, Shanghai, China

<sup>6</sup>Department of Neonatology, The First Bethune Hospital of Jilin University, Changchun, Jilin, China

<sup>7</sup>Division of Neonatology, The Children's Hospital Zhejiang University School of Medicine, Zhejiang, China

<sup>8</sup>Division of Neonatology, Children's Hospital Affiliated to Zhengzhou University, Children's Hospital of Henan Zhengzhou, Hennan, China

<sup>9</sup>Division of Neonatology and Center for Newborn Care, Guangzhou Women and Children's Medical Center, Guangdong, China

<sup>10</sup> Department of Pediatrics, Children's Hospital of Philadelphia and University of Pennsylvania Perelman School of Medicine, Pennsylvania, USA

<sup>10</sup>Maternal-Infant Care Research Centre and Department of Pediatrics Mount Sinai Hospital, Toronto, ON, Canada

<sup>11</sup>Department of Pediatrics, University of Toronto, Toronto, ON, Canada

<sup>12</sup>Department of Obstetrics and Gynecology and Dalla Lana School of Public Health, University of Toronto, Toronto, ON, Canada

## Corresponding Author

Professor Chao Chen, MD, PhD

Department of Neonatology, Children's Hospital of Fudan University, 399

Wanyuan Road, Minhang District, Shanghai, China, 201102

Email: [chaochen6010@163.com](mailto:chaochen6010@163.com)

### Authors' contacts

|              |                                                                                |
|--------------|--------------------------------------------------------------------------------|
| Mingyan Hei  | <a href="mailto:heimingyan@bch.com.cn">heimingyan@bch.com.cn</a>               |
| Xiaoying Li  | <a href="mailto:lxy_jn@sina.com">lxy_jn@sina.com</a>                           |
| Yuan Shi     | <a href="mailto:shiyuan@hospital.cqmu.edu.cn">shiyuan@hospital.cqmu.edu.cn</a> |
| Yun Cao      | <a href="mailto:yuncao@fudan.edu.cn">yuncao@fudan.edu.cn</a>                   |
| Jianhua Sun  | <a href="mailto:sunjianhua@scmc.com.cn">sunjianhua@scmc.com.cn</a>             |
| Hui Wu       | <a href="mailto:wuhui@jlu.edu.cn">wuhui@jlu.edu.cn</a>                         |
| Siyuan Jiang | <a href="mailto:jane1350@163.com">jane1350@163.com</a>                         |
| Xiaolu Ma    | <a href="mailto:maxiaolu_zjuch@zju.edu.cn">maxiaolu_zjuch@zju.edu.cn</a>       |
| Yanchen Wang | <a href="mailto:ywang77@tulane.edu">ywang77@tulane.edu</a>                     |
| Huiqing Sun  | <a href="mailto:s_huiqing@sina.com">s_huiqing@sina.com</a>                     |
| Huayan Zhang | <a href="mailto:zhangh@chop.edu">zhangh@chop.edu</a>                           |
| Lizhong Du   | <a href="mailto:dulizhong@zju.edu.cn">dulizhong@zju.edu.cn</a>                 |
| Wenhao Zhou  | <a href="mailto:zhouwenhao@fudan.edu.cn">zhouwenhao@fudan.edu.cn</a>           |
| Shoo K Lee   | <a href="mailto:shoo.lee@sinaihealth.ca">shoo.lee@sinaihealth.ca</a>           |

### Ethics information

This proposal was approved by the Ethics Committee of the Children's Hospital of Fudan University (#CHFV 2018-296) which was recognized by all participating hospitals. Waiver of consent were granted at all sites.

## Abbreviations

|      |                                                           |
|------|-----------------------------------------------------------|
| BPD  | Bronchopulmonary dysplasia                                |
| CNN  | Canadian Neonatal Network                                 |
| CHNN | Chinese Neonatal Network                                  |
| EPIQ | Evidence-based Practice for Quality Improvement           |
| INeo | International Network for Evaluating Outcomes of Neonates |
| IVH  | Intraventricular hemorrhage                               |
| NEC  | Necrotizing enterocolitis                                 |
| NI   | Nosocomial infection                                      |
| NICU | Neonatal intensive care unit                              |
| ROP  | Retinopathy of prematurity                                |
| VLBW | Very low birth weight                                     |
| VPT  | Very preterm                                              |

## Competing Interests

We have read and understood BMJ policy on declaration of interests and declare that we have no competing interests.

## Funding Statement

1  
2  
3 This work was jointly supported by Children's Hospital of Fudan University,  
4 China and the Maternal-Infant Care Research Centre at Mount Sinai Hospital, Toronto,  
5 Canada, which is supported by the Canadian Institutes of Health Research (CTP 87518)  
6 and the Ontario Ministry of Health and Long-Term Care. The funding agencies played no  
7 role in the study design; the collection, analysis, and interpretation of data; the writing of  
8 the manuscript; or the decision to submit the manuscript for publication.  
9  
10  
11  
12  
13  
14  
15  
16  
17  
18

19 **Keywords:**

20  
21  
22 Infants, Preterm; Neonatal intensive care unit; Outcomes; Neonatal network;  
23  
24 China; Neonates; Quality improvement  
25  
26  
27  
28  
29

30 **Abstract (214 words)**

31 **Introduction:** The objective of the Chinese Neonatal Network (CHNN) is to provide  
32 a platform for collaborative research, outcomes evaluation, and quality improvement for  
33 preterm infants with gestational age less than 32 weeks in China. The CHNN is the first  
34 national neonatal network and has the largest geographically representative cohort from  
35 neonatal intensive care units (NICUs) in China.  
36  
37  
38  
39  
40  
41  
42

43 **Methods and analysis:** Individual-level data from participating NICUs will be  
44 collected using a unique database developed by the CHNN on an on-going basis from  
45 January 2019. Data will be prospectively collected from all infants <32 weeks gestation  
46 or <1500 grams birth weight at 58 participating NICUs. Infant outcomes and inter-  
47 institutional variations in outcomes will be examined and used to inform quality  
48 improvement measures aimed at improving outcomes. Information about NICU  
49  
50  
51  
52  
53  
54  
55  
56  
57  
58  
59  
60



1  
2  
3 environmental and human resource factors and processes of neonatal care will also be  
4 collected and analyzed for association with outcomes. Clinical studies, including  
5  
6 randomized controlled trials will be conducted using the CHNN data platform.  
7  
8

9  
10 **Ethics and dissemination:** This study was approved by the ethics review board of  
11 Children's Hospital of Fudan University, which was recognized by all participating  
12 hospitals. Waiver of consent were granted at all sites. Only non-identifiable patient level  
13 data will be transmitted and only aggregate data will be reported in CHNN reports and  
14 publications.  
15  
16  
17  
18  
19  
20  
21  
22  
23

### 24 **Strengths and limitations of this study**

- 25  
26  
27 1. The CHNN collaboration is the first national neonatal network in China with the  
28 largest geographically representative cohort of preterm infants born at <32 weeks  
29 gestation or <1500 grams birthweight in China.  
30  
31  
32
- 33  
34 2. Findings will provide comprehensive information about neonatal outcomes in China,  
35 and may identify practices contributing to outcome variations in NICUs that can be  
36 targeted for quality improvement.  
37  
38  
39
- 40  
41 3. The knowledge generated will have potential for national and international impact.  
42
- 43  
44 4. Limitations include lack of information from community hospitals that may limit its  
45 generalizability.  
46  
47  
48  
49  
50  
51  
52  
53  
54  
55  
56  
57  
58  
59  
60

## Introduction

Preterm infants are of significant public health concern worldwide due to their high risk of mortality and morbidities<sup>[1][2][3]</sup>. The incidence of preterm births at gestational age (GA) less than 32 weeks has increased steadily and approximately 0.2 million are born each year in China<sup>[4,5]</sup>. In October 2015, China announced a national plan to end the one-child policy that had been implemented for more than 40 years, allowing some couples to have two children. A national descriptive before-and-after comparative study showed that the announcement of China's universal two-child policy was associated with a rise in births in China, and with women giving birth being more likely to be multiparous and to be aged 35 and over<sup>[6]</sup>, with an increased likelihood of preterm births.

The population of China represents almost one fifth of the global population. In China, preterm infant survival in NICUs has significantly improved in recent years<sup>[7][8]</sup>. Neonatologists in China have made progress in NICU care, and introduced advances such as fresh human milk feeding<sup>[9]</sup>, NICU infection control<sup>[10]</sup>, family-integrated care of preterm infants<sup>[11]</sup>, and better treatment of bronchopulmonary dysplasia in very low birth weight infants<sup>[12]</sup>. However, previous studies mostly involved small groups of NICUs during a defined research period, and were subject to selection bias. This has led to problems of generalization in the context of the huge Chinese population with regional differences in population characteristics, medical expertise, economic development, and health insurance coverage. It also presents difficulties for translation of clinical evidence into expert consensus practice guidelines<sup>[13][14]</sup>, even though there is strong demand for them in China.

1  
2  
3 Previous authors have demonstrated that establishing a national neonatal network  
4 and database is an important step towards understanding the status of neonatal care and  
5 outcomes in a country and can provide an effective platform for collaborative care,  
6 quality improvement (QI), research and knowledge translation[15-19]. Our goal is to  
7 establish a national Chinese Neonatal Network (CHNN) in the People's Republic of  
8 China, with a standardized database for collaborative care, quality improvement and  
9 research. This manuscript outlines the research protocol for CHNN.  
10  
11  
12  
13  
14  
15  
16  
17  
18  
19  
20

## 21 **Objectives**

22 The specific objectives of CHNN are to: (1) Establish an on-going prospectively  
23 collected standardized database of very preterm infants (VPI) with GA <32 weeks or  
24 <1500 grams birth weight among NICUs in China, as a platform for surveillance, quality  
25 improvement and research, (2) Assess and monitor major outcomes of VPI and their risk  
26 determinants, as well as inter-institutional variations in care practices and outcomes to  
27 identify clinical practices associated with good or poor outcomes, (3) Implement the  
28 Evidence-based Practice for Improving Quality (EPIQ) program to improve quality of  
29 care and outcomes, (4) Conduct collaborative research, including epidemiologic, clinical  
30 and health services studies and randomized controlled trials.  
31  
32  
33  
34  
35  
36  
37  
38  
39  
40  
41  
42  
43  
44  
45  
46

## 47 **Methods and analysis**

### 48 **Participating hospitals**

49 CHNN was founded in 2018 with 58 participating hospitals from 25 provinces  
50 throughout China (Figure 1). CHNN hospitals are tertiary referral hospitals with Grade A  
51  
52  
53  
54  
55  
56  
57  
58  
59  
60

1  
2  
3 level III NICUs authorized by the Health Administration of China and have recognized  
4 expertise in caring for high-risk neonates. They were selected to be representative of  
5 different regions of the country, and together they care for approximately 5% of all VPI  
6 in China. They include all government-designated neonatal centers of excellence in  
7 China, including four national children's medical centers, five regional children's  
8 medical centers and 30 provincial perinatal or children's medical centers. The other 19  
9 hospitals comprised major referral centers in large cities across China.

### 20 21 **Patient and Public Involvement**

22 This is a prospective, hospital-based cohort. Data will be collected on all infants  
23 <32+0 weeks GA or birth weight <1500g admitted to participating NICUs. Stillborn,  
24 delivery room death, and infants transferred to non-participating hospitals within 24  
25 hours after birth will be excluded. Readmissions and transfers between participating  
26 hospitals will be tracked as data from the same infants. Infants will be followed until  
27 NICU discharge/transfer or death. There will be the following 4 sections in establishment  
28 and utilization of the CHNN:  
29  
30  
31  
32  
33  
34  
35  
36  
37  
38  
39

40 Section 1: To establish an on-going prospectively collected standardized database

41  
42 The CHNN Coordinating and Data Centre is located at the Children's Hospital of  
43 Fudan University, Shanghai, China. The Data Center is equipped with dedicated servers  
44 that are managed by the Information Technology Department of the Children's Hospital  
45 of Fudan University in compliance with hospital, municipal and national standards for  
46 data security. A unique scalable customized database with built-in error checking based  
47 on MS Access was created in-house. A standard manual of operations and definitions was  
48  
49  
50  
51  
52  
53  
54  
55  
56  
57  
58  
59  
60

1  
2  
3 provided to all participating centers. Dedicated data abstractors are responsible for data  
4  
5 acquisition in each hospital and centralized training sessions were organized to teach data  
6  
7 abstractors to carry out data collection and uploading to the CHNN database. Data will be  
8  
9 directly entered into a dedicated computer at each hospital and electronically transmitted  
10  
11 to the CHNN Coordinating Center. Only non-identifiable patient information will be  
12  
13 transferred and only aggregate data results will be reported and published. Data checks  
14  
15 will be performed quarterly by the coordinating center for quality and completeness, and  
16  
17 site-specific data quality reports will be fed back to each site and data records returned  
18  
19 for corrections if needed. Data quality audit using data re-abstraction of randomly  
20  
21 selected patient charts will be performed annually. Site investigators will be responsible  
22  
23 for data quality control in each site. An annual report will be produced for the network.  
24  
25  
26  
27

28 Data variables of CHNN were selected by the executive committee, and include  
29  
30 demographic (birth weight, gestation, sex, Apgar score), obstetric/perinatal risk factors  
31  
32 (maternal age, race, education, smoking, drug use during pregnancy, antenatal  
33  
34 care/complications, hypertension, preterm labor/rupture of membranes, diabetes, group B  
35  
36 streptococcus carriage, chorioamnionitis, multiple gestation, antenatal steroids, delivery  
37  
38 mode and presentation, drug treatment, delivery complications and resuscitation), clinical  
39  
40 care (nutrition, assisted respiration, antibiotics, drugs, intravenous lines and catheters,  
41  
42 procedures, surgery), admission illness severity (Transport Risk Index of Physiologic  
43  
44 Stability (TRIPS)), outcomes and resource use. Definitions of variables were  
45  
46 standardized and mapped to the ICD-10[20] and SNOMED[21] dictionaries as  
47  
48 appropriate.  
49  
50  
51  
52  
53  
54  
55  
56  
57  
58  
59  
60

1  
2  
3 The primary outcome is survival without major morbidity (bronchopulmonary  
4 dysplasia (BPD), severe neurological injury (SNI), severe retinopathy of prematurity  
5 (ROP), necrotizing enterocolitis (NEC), nosocomial infection (NI)). The secondary  
6 outcomes are death, individual major morbidities (as above), patent ductus arteriosus  
7 (PDA), air leak syndrome, duration of hospitalization, duration of ventilation, duration of  
8 oxygen therapy, use of central catheters, parenteral nutrition, surgery.  
9

10  
11 Mortality is defined as death due to any cause prior to discharge home. BPD is  
12 defined as oxygen requirement at 36 weeks post-menstrual age[22]. SNI is defined as  $\geq$   
13 stage 3 intraventricular hemorrhage (IVH) with ventricular dilatation or parenchymal  
14 injury (including periventricular leukomalacia) with or without IVH, according to the  
15 Papile classification[23]. ROP is defined as  $\geq$  stage 3 according to the International  
16 Classification[24] or need for laser surgery or intraocular injections of anti-vascular  
17 endothelial growth factor agents. NEC is defined as  $\geq$  stage 2 according to Bell's  
18 criteria[25]. NI is defined as culture-proven sepsis (blood or cerebrospinal fluid positive  
19 for pathogenic organism) at  $>3$  days or 72 hours postnatal age[26]. Hemodynamically  
20 significant PDA is defined as PDA requiring pharmacological treatment or surgical  
21 ligation[27].  
22  
23  
24  
25  
26  
27  
28  
29  
30  
31  
32  
33  
34  
35  
36  
37  
38  
39  
40  
41

42 Section 2: To assess and monitor major outcomes of VPI and their risk determinants, and  
43 inter-institutional variations in care and outcomes  
44  
45

46  
47 Infant characteristics and outcomes will be summarized as counts and percentages  
48 for categorical variables and using the means and standard deviations or the medians and  
49 interquartile ranges for continuous variables. Sub-group analysis and inter-institutional  
50 comparisons will use the Chi-square test for categorical variables and ANOVA F-test or  
51  
52  
53  
54  
55  
56  
57  
58  
59  
60

1  
2  
3 Mood's median test for continuous variables. Multivariable logistic regression models  
4  
5 with adjustment for confounders will be used to assess risk factors associated with  
6  
7 outcomes.  
8  
9

10 To study inter-institutional variations in primary and secondary outcomes, the ratios  
11  
12 and associated 95% confidence intervals (CI) will be calculated, and 'caterpillar plots'  
13  
14 will be used to graphically display differences between participating sites. The 'indirect  
15  
16 standardization' approach will be used to compute the standardized outcome ratios in  
17  
18 order to adjust for multiple baseline characteristics. Each NICU can compare its own  
19  
20 observed rate with the average CHNN rate to identify the relative level of its own unit.  
21  
22 For each outcome, the expected number of events will be computed as the sum of  
23  
24 predicted probabilities from a multivariable model (logistic regression or zero inflated  
25  
26 negative binomial models based on data distribution) derived using data from all NICUs  
27  
28 with adjustment for confounders. NICU standardized outcome ratios will be graphically  
29  
30 displayed using 'funnel' plots with 95% prediction intervals for comparison between  
31  
32 NICUs. Pair-wise comparisons between NICUs will be performed using multivariate  
33  
34 regression models adjusted for confounders. The generalized estimating equation (GEE)  
35  
36 models will be used for adjusting analyses for infant cluster within the CHNN.  
37  
38 Hierarchical random-effects regression models will be used to allow for variation at unit  
39  
40 level. In addition, statistical significance will be evaluated by applying a Bonferroni  
41  
42 correction to account for multiple pair-wise comparisons.  
43  
44  
45  
46  
47  
48

49 Associations of clinical practices and other factors with outcomes will be assessed  
50  
51 under the general framework of individual patient-level data meta-analyses. Random-  
52  
53 effects models with adjustment for confounding variables and important risk factors will  
54  
55  
56  
57  
58  
59  
60

1  
2  
3 be used to assess the association and residual variation due to unknown or unmeasured  
4 unit-specific factors. These analyses will identify treatment practices and health care  
5 services with significant effects on outcomes, which subsequently can be targeted for  
6 implementation or improvement. Analyses (two-sided tests) based on 10,000 yearly  
7 admissions evaluating the effects of treatments or practices (assuming 50% exposure) on  
8 outcomes (incidence 1% to 40%) will be able to detect relative risks of 1.6 to 1.1 with a  
9 statistical power of 80% and type I error rate of 5%. This power calculation is based on  
10 the anticipated data collection by CHNN during the first year. Safety and outcome  
11 improvements will be monitored within each unit using control charts and Chi-square  
12 tests for differences from baseline in outcome rates. Multivariable logistic regression  
13 analyses will pool data from units within CHNN network to assess changes in outcomes  
14 over time with adjustment for potential confounders and important risk factors and  
15 accounting for clustering.

16  
17  
18  
19  
20  
21  
22  
23  
24  
25  
26  
27  
28  
29  
30  
31  
32  
33 Section 3: To implement the Evidence-based Practice for Improving Quality (EPIQ)  
34 program to improve quality of care and outcomes

35  
36  
37 EPIQ is a multi-faceted system for quality improvement that facilitates  
38 implementation of practice change[28]. EPIQ is based on 3 features: (a) systematic  
39 review of evidence in the published literature, (b) quantitative and qualitative analysis of  
40 outcomes and practices to identify practices associated with good or poor outcomes for  
41 targeted change, and (c) use of a collaborative network of clinicians, researchers and  
42 administrators to facilitate mutual learning and implement change. In Shanghai, Cao et al.  
43 [29] demonstrated that over a 1-year period, EPIQ reduced the rate of ventilator  
44 associated pneumonia from 48.84 per 1,000 ventilator-days to 18.50 per 1,000 ventilator-  
45  
46  
47  
48  
49  
50  
51  
52  
53  
54  
55  
56  
57  
58  
59  
60



1  
2  
3 days ( $P<0.001$ ), and rates of central line associated blood stream infection (CLABSI)  
4  
5 from 16.7 per 1,000 central line days to 5.2 per 1,000 central line days ( $P<0.01$ ).  
6  
7

8 After the first year of data collection (baseline data), we will implement EPIQ in all  
9  
10 CHNN NICUs and compare the results pre and post EPIQ implementation. A national  
11  
12 infrastructure for collaborative quality improvement will be established. Multi-  
13  
14 disciplinary groups will examine the literature, conduct systematic reviews and examine  
15  
16 hospital specific data in China to develop practice guidelines and bundles of best  
17  
18 practices for implementation in CHNN NICUs. Quarterly cycles of practice change will  
19  
20 be introduced using PDSA (Plan-Do-Study-Act) cycles of rapid change, and outcomes  
21  
22 will be monitored quarterly and results fed back to hospitals. An online Teaching &  
23  
24 Communication web portal will be used to facilitate collaboration between sites. Safety  
25  
26 will be monitored. Multivariable logistic regression analyses will pool data from units to  
27  
28 assess changes in outcomes over time with adjustment for potential confounders and  
29  
30 important risk factors.  
31  
32  
33

34  
35 Section 4: To conduct collaborative research, including epidemiologic, clinical and health  
36  
37 services studies and randomized controlled trials.  
38  
39

40 The CHNN database platform will support additional research initiatives, including  
41  
42 epidemiologic, clinical and health services and randomized controlled trials. Research  
43  
44 projects can be initiated by any CHNN member, approved by the CHNN Scientific  
45  
46 Advisory Committee, and coordinated through the CHNN Coordinating Centre, where  
47  
48 data will also be collected and analyzed. In future stages, limited datasets may be released  
49  
50 to investigators using a secure electronic portal system.  
51  
52  
53  
54  
55  
56  
57  
58  
59  
60

## **Ethics and dissemination**

Central ethics approval was obtained from the Ethics Committee of the Children's Hospital of Fudan University (#CHFUFU 2018-296) and recognized by all participating sites. All participating sites have signed data transfer agreements with the CHNN Coordinating Centre and obtained ethics approval from their affiliated institutions or hospitals to allow sending de-identified data to the CHNN Coordinating Centre in compliance with national, provincial and local hospital regulations for ensuring patient privacy and confidentiality.

## **Discussion**

The CHNN collaboration will be the first national network to examine data from a large cohort of preterm infants that is representative of the different regions of China on an on-going basis. This is important because China has a huge population, with many regional differences in social, economic and health care development. Unfortunately, the existing literature regarding preterm infants in China has been mostly limited to single-centre studies or multicentre studies with small numbers of participating sites[8,10,29,30]. Findings from this national collaboration will provide a comprehensive picture of outcomes of very preterm infants in Chinese NICUs and establish a strong system for outcomes surveillance and monitoring trends in clinical practices and outcome variations. Data from CHNN will also provide robust estimates for development of clinical practice guidelines and health care recommendations that can be generalizable across the country.

1  
2  
3 Quality improvement is a key goal, especially for China where neonatal care is still  
4 developing and there is significant room for improvement. The adoption of EPIQ will  
5 provide a robust system for quality improvement in Chinese NICUs. EPIQ was pioneered  
6 by the Canadian Neonatal Network, where Lee et al [28] first demonstrated 44%  
7 reduction in nosocomial infection and 15% reduction in bronchopulmonary dysplasia in a  
8 multi-center randomized controlled trial, and EPIQ is now practiced in all Canadian  
9 NICUs. In a comparative study of outcomes by the International Network for Evaluation  
10 of Outcomes (iNEO), the implementation of EPIQ nationally was credited with rapidly  
11 improving neonatal outcomes in Canada in comparison with other countries[31,32].  
12 Subsequent studies in Canada and China provided confirmation of its efficacy[33-35].  
13 Since Chinese NICUs have experience using EPIQ, this will facilitate its implementation  
14 in Chinese NICUs and provide a proven method for improving quality of care and  
15 outcomes in China. However, we recognize that change can be difficult to implement,  
16 especially those that require making financial investments, adding staff, or breaking  
17 cultural traditions. Notwithstanding possible early reluctance to follow these  
18 recommendations, the strength of evidence produced from the data, the pragmatic nature  
19 of the results, and the examples provided by “early adopter” NICUs will be the most  
20 persuasive elements of the CHNN collaboration.  
21  
22  
23  
24  
25  
26  
27  
28  
29  
30  
31  
32  
33  
34  
35  
36  
37  
38  
39  
40  
41  
42  
43

44 The flexibility of the CHNN data platform to accommodate additional studies like  
45 randomized controlled trials provides a unique opportunity for Chinese NICUs. China has  
46 a large population, which is conducive to conducting multi-center studies rapidly and  
47 efficiently. Once the CHNN data platform is fully functional, we anticipate that China  
48 will play a leading role in conducting large scale multi-center studies and clinical trials.  
49  
50  
51  
52  
53  
54  
55  
56  
57  
58  
59  
60

1  
2  
3 In summary, the CHNN collaboration will serve as a strong national platform for  
4 collaborative research, outcomes evaluation, and quality improvement for VPI in China.  
5  
6 The knowledge generated will have potential to benefit infants and families in China and  
7  
8 internationally.  
9  
10  
11  
12  
13  
14

### 15 **Author Contributions:**

16  
17  
18 Study concept and design: Shoo K Lee, Chen Chao, Mingyan Hei  
19

20  
21 Drafting of the manuscript: Mingyan Hei, Shoo K Lee  
22

23  
24 Critical revision of the manuscript for important intellectual content: All authors  
25

26  
27 Statistical analysis: Yanchen Wang  
28

29  
30 Study supervision: Mingyan Hei, Chao Chen, Shoo K Lee, Wenhao Zhou  
31  
32  
33  
34  
35

36 **Group Information: Chairmen:** Shoo K. Lee, MBBS, Mount Sinai Hospital, University  
37 of Toronto; Chao Chen, MD, Children's Hospital of Fudan University. **Vice-Chairmen:**  
38 Lizhong Du, MD, Children's Hospital of Zhejiang University School of Medicine;  
39 Wenhao Zhou, Children's Hospital of Fudan University. **Site investigators of the**  
40 **Chinese Neonatal Network:** Children's Hospital of Fudan University: Yun Cao, MD;  
41 The Third Affiliated Hospital of Zhengzhou University: Falin Xu, MD; Tianjin Obstetrics  
42 & Gynecology Hospital: Xiuying Tian, MD; Guangzhou Women and Children's Medical  
43 Center: Huayan Zhang, MD; Children's Hospital of Shanxi: Yong Ji, MD; Northwest  
44 Women's and Children's Hospital: Zhankui Li, MD; Gansu Provincial Maternity and  
45  
46  
47  
48  
49  
50  
51  
52  
53  
54  
55  
56  
57  
58  
59  
60

1  
2  
3 Child Care Hospital: Bin Yi, MD; Shengjing Hospital of China Medical University:  
4  
5 Xindong Xue, MD; Shenzhen Maternity and Child Health Care Hospital: Chuanzhong  
6  
7 Yang, MD; Quanzhou Women and Children's Hospital: Dongmei Chen, MD; Suzhou  
8  
9 Municipal Hospital affiliated to Nanjing Medical University: Sannan Wang, MD;  
10  
11 Guizhou Women and Children's Hospital/Guiyang Children's Hospital: Ling Liu, MD;  
12  
13 Hunan Children's Hospital: Xirong Gao, MD; The First Bethune Hospital of Jilin  
14  
15 University: Hui Wu, MD; Fujian Maternity and Child Health Hospital , Affiliated  
16  
17 Hospital of Fujian Medical University: Changyi Yang, MD; Nanjing Maternity and Child  
18  
19 Health Care Hospital: Shuping Han, MD; Qingdao Women and Children's Hospital:  
20  
21 Ruobing Shan, MD; The Affiliated Hospital of Qingdao University: Hong Jiang, MD;  
22  
23 Children's Hospital of Shanghai: Gang Qiu, MD; Women and Children's Hospital of  
24  
25 Guangxi Zhuang Autonomous Region: Xinnian Pan, MD; Children's Hospital of Nanjing  
26  
27 Medical University: Youyan Zhao, MD; Henan Children's Hospital: Wenqing Kang,  
28  
29 MD; The First Affiliated Hospital of Xinjiang Medical University: Mingxia Li, MD;  
30  
31 Foshan Women and Children's Hospital: Xuqiang Ye, MD; The First Affiliated Hospital  
32  
33 of Anhui Medical University: Lili Wang, MD; Shanghai First Maternity and Infant  
34  
35 Hospital: Jiangqin Liu MD; Yuying Children's Hospital Affiliated to Wenzhou Medical  
36  
37 University: Zhenlang Lin, MD; Children's Hospital of Chongqing Medical University:  
38  
39 Yuan Shi, MD; The First Affiliated Hospital of Zhengzhou University: Xiuyong Cheng,  
40  
41 MD; The First Affiliated Hospital of USTC, Division of Life Sciences and Medicine,  
42  
43 University of Science and Technology of China: Jiahua Pan, MD; Shaanxi Provincial  
44  
45 People's Hospital: Qin Zhang, MD; Children's Hospital of Soochow University: Xing  
46  
47 Feng, MD; Wuxi Maternity and Child Healthcare Hospital: Qin Zhou, MD; People's  
48  
49  
50  
51  
52  
53  
54  
55  
56  
57  
58  
59  
60

1  
2  
3 Hospital of Xinjiang Uygur Autonomous Region: Long Li, MD; The Second Xiangya  
4 Hospital of Central South University: Pingyang Chen, MD; Qilu Children's Hospital of  
5 Shandong University: Xiaoying Li, MD; Hainan Women and Children's Hospital: Ling  
6 Yang, MD; Xiamen Children's Hospital: Deyi Zhuang, MD; Xinhua Hospital affiliated to  
7 Shanghai Jiao Tong University School of Medicine: Yongjun Zhang, MD; Shanghai  
8 Children's Medical Center, Shanghai Jiao Tong University School of Medicine: Jianhua  
9 Sun, MD; Shenzhen Children's Hospital: Jinxing Feng, MD; Children's Hospital  
10 Affiliated to Capital Institute of Pediatrics: Li Li, MD; Women and Children's Hospital,  
11 School of Medicine, Xiamen university: Xinzhu Lin, MD; General Hospital of Ningxia  
12 Medical University: Yinping Qiu, MD; First Affiliated Hospital of Kunming Medical  
13 University: Kun Liang, MD; Hebei Provincial Children's Hospital: Li Ma, MD; Jiangxi  
14 Provincial Children's Hospital: Liping Chen, MD; Fuzhou Children's Hospital of Fujian  
15 Province: Liyan Zhang, MD; First Affiliated Hospital of Xian Jiao Tong University:  
16 Hongxia Song, MD; Dehong people's Hospital of Yunnan Province: Zhaoqing Yin, MD;  
17 Beijing Children's Hospital, Capital Medical University: Mingyan Hei, MD; Zhuhai  
18 Center for Maternal and Child Health Care: Huiwen Huang, MD; Guangdong Women  
19 and Children's Hospital: Jie Yang, MD; Dalian Municipal Women and Children's  
20 Medical Center: Dong Li, MD; Peking Union Medical College Hospital: Guofang Ding,  
21 MD; Obstetrics & Gynecology Hospital of Fudan University: Jimei Wang, MD;  
22 Shenzhen Hospital of Hongkong University: Qianshen Zhang, MD; Children's Hospital  
23 of Zhejiang University School of Medicine: Xiaolu Ma, MD  
24  
25  
26  
27  
28  
29  
30  
31  
32  
33  
34  
35  
36  
37  
38  
39  
40  
41  
42  
43  
44  
45  
46  
47  
48  
49  
50  
51  
52  
53  
54

## 55 Acknowledgements

56  
57  
58  
59  
60

We would like to deeply thank Prof. Jianxing Zhu, Prof. Dezhi Mu, and Prof. Xing Feng for their dedicated support of the Chinese Neonatal Network. We would also like to thank Heather McDonald Kinkaid, PhD, from the Maternal-Infant Care Research Centre (MiCare) at Mount Sinai Hospital in Toronto, Canada, for editorial assistance; and Xiang Y. Ye, MSc, from the MiCare, for ongoing statistical supervision. MiCare is supported by the Canadian Institutes of Health Research and the Ontario Ministry of Health and Long-Term Care. We also thank all staffs from participating hospitals of the CHNN.

## References

1. da Cunha Durães MI, Flor-De-Lima F, Rocha G, Soares H, Guimarães H. Morbidity and mortality of preterm infants less than 26 weeks of gestational age. *Minerva Pediatr.* 2019;71(1):12-20. doi:10.23736/S0026-4946.16.04609-0.
2. Huff K, Rose RS, Engle WA. Late preterm infants: morbidities, mortality, and management recommendations. *Pediatr Clin North Am.* 2019;66(2):387-402. doi:10.1016/j.pcl.2018.12.008.
3. Richter LL, Ting J, Muraca GM, Synnes A, Lim KI, Lisonkova S. Temporal trends in neonatal mortality and morbidity following spontaneous and clinician-initiated preterm birth in Washington State, USA: a population-based study. *BMJ Open.* 2019;9(1):e023004. doi:10.1136/bmjopen-2018-023004.
4. National Bureau of Statistics Population. Population. China statistic year book 2019. <http://www.stats.gov.cn/tjsj/ndsj/2019/indexch.htm>. Accessed November 30, 2020.
5. Chen C, Zhang JW, Xia HW, et al. Preterm birth in china between 2015 and 2016.

- 1  
2  
3 *Am J Public Health.* 2019;109(11):1597-1604.  
4  
5  
6 6. Li HT, Xue M, Hellerstein S, Cai Y, Gao Y, Zhang Y, et al. Association of China's  
7  
8 universal two child policy with changes in births and birth related health factors:  
9  
10 national, descriptive comparative study. *BMJ.* 2019;366:l4680.  
11  
12 doi:10.1136/bmj.l4680.  
13  
14  
15 7. Shah PS, Sankaran K, Aziz K, Allen AC, Seshia M, Ohlsson A, Lee SK: Outcomes of  
16  
17 preterm infants <29 weeks gestation over 10-year period in Canada: a cause for  
18  
19 concern? *J Perinatol* 2012, 32:132-138  
20  
21  
22 8. Li SJ, Yan SY, Zhou Y, Han KL, Guo WL, Xia Q, et al. Ventilator-associated  
23  
24 pneumonia among premature infants <34 weeks' gestational age in neonatal intensive  
25  
26 care unit in China: a multicenter study. *Chin J Pediatr.* 2017; 55(3):182-7  
27  
28  
29 9. Huiqing Sun, Shuping Han, Rui Cheng, Mingyan Hei, Foteini Kakulas, Shoo K. Lee.  
30  
31 Testing the feasibility and safety of feeding preterm infants fresh mother's own milk  
32  
33 in the NICU: A pilot study. *Scientific Reports* 2019,9:941-949  
34  
35  
36 10. Jiang S, Yang Z, Shan R, Zhang Y, Yan W, Yang Y, et al. Neonatal outcomes  
37  
38 following culture-negative late-onset sepsis among preterm infants. *Pediatr Infect Dis*  
39  
40 *J.* 2020;39(3):232-238. doi:10.1097/inf.0000000000002558.  
41  
42  
43 11. Hei M, Gao X, Gao X, et al. Is family integrated care in neonatal intensive care units  
44  
45 feasible and good for preterm infants in China: study protocol for a cluster  
46  
47 randomized controlled trial. *Trials.* 2016;17:22. doi:10.1186/s13063-015-1152-9  
48  
49  
50 12. Jiangsu Multicenter Study Collaborative Group for Breastmilk Feeding in Neonatal  
51  
52 Intensive Care Units. Clinical characteristics and risk factors of very low birth weight  
53  
54 infants with bronchopulmonary dysplasia: multicenter retrospective analysis [in  
55  
56  
57  
58  
59  
60



- Chinese]. *Chin J Pediatr*, 2019,57(1):33-39 DOI:10.3760/cma.j.issn.0578-1310.2019.01.009
13. The Subspecialty Group of Neonatology, the Society of Pediatrics, Chinese Medical Association; the Editorial Board, Chinese Journal of Pediatrics. Expert consensus on clinical management of premature infants with Bronchopulmonary dysplasia [Chinese]. *Chin J Pediatr*, 2020,58(05):358-365. DOI: 10.3760/cma.j.cn112140-20200317-00254
14. Experts Working Group on Consensus on the Use of Human Milk Fortifier in Preterm Infants; Editorial Board Committee of Chinese Journal of Neonatology. Consensus on the use of human milk fortifier for preterm infants [in Chinese]. *Chin J Neonatol*, 2019,34(5):321-328. DOI: 10.3760/cma.j.issn.2096-2932.2019.05.001
15. Rochow N, Landau-Crangle E, Lee S, Schünemann H, Fusch C. Quality Indicators but Not Admission Volumes of Neonatal Intensive Care Units Are Effective in Reducing Mortality Rates of Preterm Infants. *PLoS One*. 2016;11(8):e0161030. doi:10.1371/journal.pone.0161030
16. Lee SK, McMillan DD, Ohlsson A, Pendray M, Synnes A, Whyte R, Chien LY, Sale J: Variations in practice and outcomes in the Canadian NICU network: 1996–1997. *Pediatrics* 2000, 106:1070-1079
17. Fellman V, Hellstrom-Westas L, Norman M, Westgren M, Kallen K, Lagercrantz H, Marsal K, Serenius F, Wennergren M: One-year survival of extremely preterm infants after active perinatal care in Sweden. *JAMA* 2009, 301:2225-2233
18. Bader D, Kugelman A, Boyko V, Levitzki O, Lerner-Geva L, Riskin A, Reichman B: Risk factors and estimation tool for death among extremely premature infants: a

- 1  
2  
3 national study. *Pediatrics* 2010, 125:696-703  
4  
5  
6 19. Gale C, Santhakumaran S, Nagarajan S, Statnikov Y, Modi N: Impact of managed  
7  
8 clinical networks on NHS specialist neonatal services in England: population based  
9  
10 study. *BMJ* 2012, 344:e2105  
11  
12  
13 20. World Health Organization: International Statistical Classification of Diseases and  
14  
15 Related Health Problems 10th Revision (ICD-10). 2010.  
16  
17 <http://apps.who.int/classifications/icd10/browse/2010/en> website  
18  
19  
20 21. International Health Terminology Standards Development Organisation. SNOMED  
21  
22 CT. 2012. <http://www.ihtsdo.org/snomed-ct/>  
23  
24 22. Shennan AT, Dunn MS, Ohlsson A, et al. Abnormal pulmonary outcomes in  
25  
26 premature infants: prediction from oxygen requirement in the neonatal period.  
27  
28 *Pediatrics* 1988;82:527-32.  
29  
30  
31 23. Papile LA, Burstein J, Burstein R, et al. Incidence and evolution of subependymal  
32  
33 and intraventricular hemorrhage: a study of infants with birth weights less than 1,500  
34  
35 gm. *J Pediatr* 1978;92:529-34.  
36  
37  
38 24. The International Classification of Retinopathy of Prematurity revisited. *Arch*  
39  
40 *Ophthalmol* 2005;123:991-9.  
41  
42  
43 25. Bell MJ, Ternberg JL, Feigin RD, et al. Neonatal necrotizing enterocolitis.  
44  
45 Therapeutic decisions based upon clinical staging. *Ann Surg* 1978;187:1-7.  
46  
47  
48 26. Freeman J, Epstein MF, Smith NE, Platt R, Sidebottom DG, Goldmann DA: Extra  
49  
50 hospital stay and antibiotic usage with nosocomial coagulase-negative staphylococcal  
51  
52 bacteremia in two neonatal intensive care unit populations. *Am J Dis Child* 1990,  
53  
54 144:324-329.  
55  
56  
57  
58  
59  
60

- 1  
2  
3 27. Jasani B, Weisz DE, McNamara PJ. Evidence-based use of acetaminophen for  
4 hemodynamically significant ductus arteriosus in preterm infants. *Semin*  
5 *Perinatol.* 2018;42(4):243-252  
6  
7  
8  
9  
10 28. Lee SK, Aziz K, Singhal N, Cronin CM, James A, Lee DS, Matthew D, Ohlsson A,  
11 Sankaran K, Seshia M, Synnes A, Walker R, Whyte R, Langley J, Macnab YC,  
12 Stevens B, von Dadelszen P: Improving the quality of care for infants: a cluster  
13 randomized controlled trial. *CMAJ* 2009; 181:469-476  
14  
15  
16  
17  
18  
19 29. Cao Y, Jiang SY, Zhou Q. Introducing evidence-based practice improvement in  
20 Chinese neonatal intensive care units. *Transl Pediatr.* 2019; 8(3): 257–261. doi:  
21 10.21037/tp.2019.07.07  
22  
23  
24  
25  
26 30. REIN-EPIQ Study Group. Outcomes of very low birth weight infants at discharge: a  
27 multicentered cross-sectional study of 25 tertiary neonatal intensive care units in  
28 China [Chinese]. *Chin J Peirnat Med.* 2018; 21(6):294-400  
29  
30  
31  
32  
33 31. Prakesh S Shah, Shoo K Lee, Kei Lui, Gunnar Sjörs, Rintaro Mori, Brian Reichman,  
34 et al and on behalf of the International Network for Evaluating Outcomes of Neonates  
35 (iNeo). The International Network for Evaluating Outcomes of very low birth weight,  
36 very preterm neonates (iNeo): a protocol for collaborative comparisons of  
37 international health services for quality improvement in neonatal care. *BMC*  
38 *Pediatrics* 2014, 14:110 doi:10.1186/1471-2431-14-110  
39  
40  
41  
42  
43  
44  
45  
46  
47 32. Lui K, Lee SK, Kusuda S, Adams M, Vento M, Reichman B, Darlow BA, Lehtonen  
48 L, Modi N, Norman M, Håkansson S, Bassler D, Rusconi F, Lodha A, Yang JM,  
49 Shah PS, iNeo Investigators. Trends in neonatal outcomes for very preterm and very  
50 low birth weight neonates in 11 countries. *J Pediatr* 2019;215:32–40.e14. DOI:  
51  
52  
53  
54  
55  
56  
57  
58  
59  
60

1  
2  
3 10.1016/j.jpeds.2019.08.020  
4

- 5  
6 33. Lee SK, Aziz K, Singhal N, Cronin CM. The Evidence-based Practice for Improving  
7  
8 Quality method has greater impact on improvement of outcomes than dissemination  
9  
10 of practice change guidelines and quality improvement training in neonatal intensive  
11  
12 care units. *Paediatr Child Health*. 2015;20(1):e1-e9.  
13
- 14  
15 34. Lee SK, Shah PS, Singhal N, et al. Association of a quality improvement program  
16  
17 with neonatal outcomes in extremely preterm infants: a prospective cohort study.  
18  
19 *CMAJ*. 2014;186(13):E485 - E494. doi:10.1503/cmaj.140399  
20  
21
- 22 35. Cronin CM, Baker GR, Lee SK, et al. Reflections on knowledge translation in  
23  
24 Canadian NICUs using the EPIQ method. *Healthc Q*. 2011;14 Spec No 3:8-16.  
25  
26 doi:10.12927/hcq.2011.22539  
27  
28  
29  
30  
31  
32  
33  
34  
35  
36  
37  
38  
39  
40  
41  
42  
43  
44  
45  
46  
47  
48  
49  
50  
51  
52  
53  
54  
55  
56  
57  
58  
59  
60

**Figure legend****Figure 1. Map of 58 participating hospitals in Chinese Neonatal Network**

There were 58 member hospitals from 25 provinces in China that are participating in the CHNN. The distribution of the 58 member hospitals is almost geographically throughout the mainland China.

**Word Count**

2573 words

For peer review only

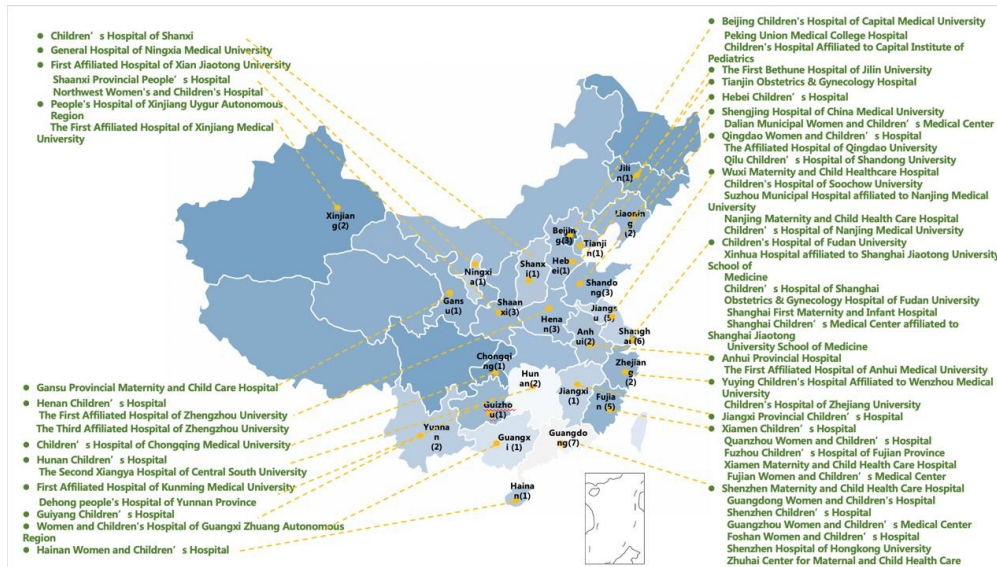

Figure 1. Map of 58 participating hospitals in Chinese Neonatal Network  
 There were 58 member hospitals from 25 provinces in China that are participating in the CHNN. The distribution of the 58 member hospitals is almost geographically throughout the mainland China.

146x82mm (220 x 220 DPI)

# BMJ Open

## The Chinese Neonatal Network: a national protocol for collaborative research and quality improvement in neonatal care

|                                 |                                                                                                                                                                                                                                                                                                                                                                                                                                                                                                                                                                                                                                                                                                                                                                                                                                                                                                                                                                                                                                                                                                                                                                                                                                                                                                                                                                                                                                                                                                                                                                                                                                                                                                                        |
|---------------------------------|------------------------------------------------------------------------------------------------------------------------------------------------------------------------------------------------------------------------------------------------------------------------------------------------------------------------------------------------------------------------------------------------------------------------------------------------------------------------------------------------------------------------------------------------------------------------------------------------------------------------------------------------------------------------------------------------------------------------------------------------------------------------------------------------------------------------------------------------------------------------------------------------------------------------------------------------------------------------------------------------------------------------------------------------------------------------------------------------------------------------------------------------------------------------------------------------------------------------------------------------------------------------------------------------------------------------------------------------------------------------------------------------------------------------------------------------------------------------------------------------------------------------------------------------------------------------------------------------------------------------------------------------------------------------------------------------------------------------|
| Journal:                        | <i>BMJ Open</i>                                                                                                                                                                                                                                                                                                                                                                                                                                                                                                                                                                                                                                                                                                                                                                                                                                                                                                                                                                                                                                                                                                                                                                                                                                                                                                                                                                                                                                                                                                                                                                                                                                                                                                        |
| Manuscript ID                   | bmjopen-2021-051175.R1                                                                                                                                                                                                                                                                                                                                                                                                                                                                                                                                                                                                                                                                                                                                                                                                                                                                                                                                                                                                                                                                                                                                                                                                                                                                                                                                                                                                                                                                                                                                                                                                                                                                                                 |
| Article Type:                   | Protocol                                                                                                                                                                                                                                                                                                                                                                                                                                                                                                                                                                                                                                                                                                                                                                                                                                                                                                                                                                                                                                                                                                                                                                                                                                                                                                                                                                                                                                                                                                                                                                                                                                                                                                               |
| Date Submitted by the Author:   | 15-Aug-2021                                                                                                                                                                                                                                                                                                                                                                                                                                                                                                                                                                                                                                                                                                                                                                                                                                                                                                                                                                                                                                                                                                                                                                                                                                                                                                                                                                                                                                                                                                                                                                                                                                                                                                            |
| Complete List of Authors:       | <p>Hei, Mingyan; Beijing Children's Hospital Capital Medical University, Neonatal Center; National Center for Children's Health, Neonatal Center<br/>         Li, Xiaoying; Qilu Children's Hospital of Shandong University<br/>         Shi, Yuan; Children's Hospital of Chongqing Medical University, Department of Neonatology<br/>         Cao, Yun; Children's Hospital of Fudan University, Neonatology<br/>         Sun, Jianhua; Shanghai Children's Medical Center, Shanghai Jiao Tong University School of Medicine<br/>         Wu, Hui; The First Bethune Hospital of Jilin University, Neonatology<br/>         Jiang, Siyuan; Children's Hospital of Fudan University<br/>         Ma, Xiaolu; The Children's Hospital Zhejiang University School of Medicine, Neonatology<br/>         Wang, Yanchen; Children's Hospital of Fudan University<br/>         Sun, Huiqing; Children's Hospital Affiliated to Zhengzhou University, Division of Neonatology; Children's Hospital of Henan Zhengzhou<br/>         Zhang, Huayan; Guangzhou Women and Children's Medical Center, Division of Neonatology and Center for Newborn Care; Children's Hospital of Philadelphia and University of Pennsylvania Perelman School of Medicine, Department of Pediatrics<br/>         Du, Li-Zhong ; The Children's Hospital Zhejiang University School of Medicine<br/>         Zhou, Wenhao; Children's Hospital of Fudan University<br/>         Lee, Shoo; University of Toronto, Department of Pediatrics; University of Toronto, Department of Obstetrics and Gynecology and Dalla Lana School of Public Health<br/>         Chen, Chao; Children's Hospital of Fudan University, Department of Neonatology</p> |
| <b>Primary Subject Heading</b>: | Epidemiology                                                                                                                                                                                                                                                                                                                                                                                                                                                                                                                                                                                                                                                                                                                                                                                                                                                                                                                                                                                                                                                                                                                                                                                                                                                                                                                                                                                                                                                                                                                                                                                                                                                                                                           |
| Secondary Subject Heading:      | Paediatrics, Epidemiology, Intensive care                                                                                                                                                                                                                                                                                                                                                                                                                                                                                                                                                                                                                                                                                                                                                                                                                                                                                                                                                                                                                                                                                                                                                                                                                                                                                                                                                                                                                                                                                                                                                                                                                                                                              |
| Keywords:                       | NEONATOLOGY, Protocols & guidelines < HEALTH SERVICES ADMINISTRATION & MANAGEMENT, Neonatal intensive & critical care < INTENSIVE & CRITICAL CARE, PERINATOLOGY, QUALITATIVE RESEARCH                                                                                                                                                                                                                                                                                                                                                                                                                                                                                                                                                                                                                                                                                                                                                                                                                                                                                                                                                                                                                                                                                                                                                                                                                                                                                                                                                                                                                                                                                                                                  |
|                                 |                                                                                                                                                                                                                                                                                                                                                                                                                                                                                                                                                                                                                                                                                                                                                                                                                                                                                                                                                                                                                                                                                                                                                                                                                                                                                                                                                                                                                                                                                                                                                                                                                                                                                                                        |

1  
2  
3  
4  
5  
6  
7  
8  
9  
10  
11  
12  
13  
14  
15  
16  
17  
18  
19  
20  
21  
22  
23  
24  
25  
26  
27  
28  
29  
30  
31  
32  
33  
34  
35  
36  
37  
38  
39  
40  
41  
42  
43  
44  
45  
46  
47  
48  
49  
50  
51  
52  
53  
54  
55  
56  
57  
58  
59  
60

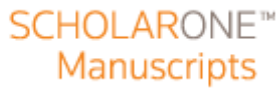



## TITLE PAGE

### **Title:**

The Chinese Neonatal Network: a national protocol for collaborative research and quality improvement in neonatal care

### **Running title:**

Protocol for CHNN collaborative research in China

### **Authors and affiliations:**

Mingyan Hei<sup>1</sup>, MD, PhD; Xiaoying Li<sup>2</sup>, MD, PhD; Yuan Shi<sup>3</sup>, MD, PhD; Yun Cao<sup>4</sup>, MD, PhD; Jianhua Sun<sup>5</sup>, MD; Hui Wu<sup>6</sup>, MD; Siyuan Jiang<sup>4</sup>, MD, PhD; Xiaolu Ma<sup>7</sup>, MD; Yanchen Wang<sup>4</sup>, MSC ; Huiqing Sun<sup>8</sup>, MD, PhD; Huayan Zhang<sup>9,10</sup>, MD; Lizhong Du<sup>7</sup>, MD, PhD; Wenhao Zhou<sup>4</sup>, MD, PhD; Shoo K Lee<sup>11,12</sup>, FRCPC; Chao Chen<sup>4</sup>, MD, PhD; on behalf of the Chinese Neonatal Network (CHNN)\*

(\* A full list of the CHNN Investigators is provided in the Group Information)

<sup>1</sup>Neonatal Center, Beijing Children's Hospital, Capital Medical University, Beijing China

<sup>2</sup>Department of Neonatology, Qilu Children's Hospital of Shandong University, Jinan, Shandong, China

<sup>3</sup>Department of Neonatology, Children's Hospital of Chongqing Medical University, Chongqing, China

1  
2  
3 <sup>4</sup>Department of Neonatology, Children's Hospital of Fudan University, Shanghai,  
4  
5 China

6  
7  
8 <sup>5</sup> Department of Neonatology, Shanghai Children's Medical Center, Shanghai Jiao  
9  
10 Tong University School of Medicine, Shanghai, China

11  
12 <sup>6</sup>Department of Neonatology, The First Bethune Hospital of Jilin University,  
13  
14 Changchun, Jilin, China

15  
16  
17 <sup>7</sup>Division of Neonatology, The Children's Hospital Zhejiang University School of  
18  
19 Medicine, Zhejiang, China

20  
21  
22 <sup>8</sup>Division of Neonatology, Children's Hospital Affiliated to Zhengzhou University,  
23  
24 Children's Hospital of Henan Zhengzhou, Hennan, China

25  
26  
27 <sup>9</sup>Division of Neonatology and Center for Newborn Care, Guangzhou Women and  
28  
29 Children's Medical Center, Guangdong, China

30  
31 <sup>10</sup> Department of Pediatrics, Children's Hospital of Philadelphia and University of  
32  
33 Pennsylvania Perelman School of Medicine, Pennsylvania, USA

34  
35  
36 <sup>10</sup>Maternal-Infant Care Research Centre and Department of Pediatrics Mount Sinai  
37  
38 Hospital, Toronto, ON, Canada

39  
40 <sup>11</sup>Department of Pediatrics, University of Toronto, Toronto, ON, Canada

41  
42  
43 <sup>12</sup>Department of Obstetrics and Gynecology and Dalla Lana School of Public  
44  
45 Health, University of Toronto, Toronto, ON, Canada

## 46 47 48 49 **Corresponding Author**

50  
51  
52 Professor Chao Chen, MD, PhD

Department of Neonatology, Children's Hospital of Fudan University, 399

Wanyuan Road, Minhang District, Shanghai, China, 201102

Email: [chaochen6010@163.com](mailto:chaochen6010@163.com)

## Authors' contacts

|              |                                                                                |
|--------------|--------------------------------------------------------------------------------|
| Mingyan Hei  | <a href="mailto:heimingyan@bch.com.cn">heimingyan@bch.com.cn</a>               |
| Xiaoying Li  | <a href="mailto:lxy_jn@sina.com">lxy_jn@sina.com</a>                           |
| Yuan Shi     | <a href="mailto:shiyuan@hospital.cqmu.edu.cn">shiyuan@hospital.cqmu.edu.cn</a> |
| Yun Cao      | <a href="mailto:yuncao@fudan.edu.cn">yuncao@fudan.edu.cn</a>                   |
| Jianhua Sun  | <a href="mailto:sunjianhua@scmc.com.cn">sunjianhua@scmc.com.cn</a>             |
| Hui Wu       | <a href="mailto:wuhui@jlu.edu.cn">wuhui@jlu.edu.cn</a>                         |
| Siyuan Jiang | <a href="mailto:jane1350@163.com">jane1350@163.com</a>                         |
| Xiaolu Ma    | <a href="mailto:maxiaolu_zjuch@zju.edu.cn">maxiaolu_zjuch@zju.edu.cn</a>       |
| Yanchen Wang | <a href="mailto:ywang77@tulane.edu">ywang77@tulane.edu</a>                     |
| Huiqing Sun  | <a href="mailto:s_huiqing@sina.com">s_huiqing@sina.com</a>                     |
| Huayan Zhang | <a href="mailto:zhangh@chop.edu">zhangh@chop.edu</a>                           |
| Lizhong Du   | <a href="mailto:dulizhong@zju.edu.cn">dulizhong@zju.edu.cn</a>                 |
| Wenhao Zhou  | <a href="mailto:zhouwenhao@fudan.edu.cn">zhouwenhao@fudan.edu.cn</a>           |
| Shoo K Lee   | <a href="mailto:shoo.lee@sinahealth.ca">shoo.lee@sinahealth.ca</a>             |

## Ethics information

This proposal was approved by the Ethics Committee of the Children's Hospital of Fudan University (#CHFUFU 2018-296) which was recognized by all participating hospitals. Waiver of consent were granted at all sites.

## Abbreviations

|      |                                                           |
|------|-----------------------------------------------------------|
| BPD  | Bronchopulmonary dysplasia                                |
| CNN  | Canadian Neonatal Network                                 |
| CHNN | Chinese Neonatal Network                                  |
| EPIQ | Evidence-based Practice for Quality Improvement           |
| INeo | International Network for Evaluating Outcomes of Neonates |
| IVH  | Intraventricular hemorrhage                               |
| NEC  | Necrotizing enterocolitis                                 |
| NI   | Nosocomial infection                                      |
| NICU | Neonatal intensive care unit                              |
| ROP  | Retinopathy of prematurity                                |
| VLBW | Very low birth weight                                     |
| VPT  | Very preterm                                              |

## Competing Interests

We have read and understood BMJ policy on declaration of interests and declare that we have no competing interests.

## Funding Statement

1  
2  
3 This work was jointly supported by Children's Hospital of Fudan University, China  
4 and the Maternal-Infant Care Research Centre at Mount Sinai Hospital, Toronto, Canada,  
5 which is supported by the Canadian Institutes of Health Research (CTP 87518) and the  
6 Ontario Ministry of Health and Long-Term Care. The funding agencies played no role in  
7 the study design; the collection, analysis, and interpretation of data; the writing of the  
8 manuscript; or the decision to submit the manuscript for publication.  
9  
10  
11  
12  
13  
14  
15  
16  
17  
18

19 **Keywords:**

20  
21  
22 Infants, Preterm; Neonatal intensive care unit; Outcomes; Neonatal network;  
23  
24 China; Neonates; Quality improvement  
25  
26  
27  
28  
29

30 **Abstract (214 words)**

31 **Introduction:** The objective of the Chinese Neonatal Network (CHNN) is to provide  
32 a platform for collaborative research, outcomes evaluation, and quality improvement for  
33 preterm infants with gestational age less than 32 weeks in China. The CHNN is the first  
34 national neonatal network and has the largest geographically representative cohort from  
35 neonatal intensive care units (NICUs) in China.  
36  
37  
38  
39  
40  
41  
42

43 **Methods and analysis:** Individual-level data from participating NICUs will be  
44 collected using a unique database developed by the CHNN on an on-going basis from  
45 January 2019. Data will be prospectively collected from all infants <32 weeks gestation or  
46 <1500 grams birth weight at 58 participating NICUs. Infant outcomes and inter-  
47 institutional variations in outcomes will be examined and used to inform quality  
48 improvement measures aimed at improving outcomes. Information about NICU  
49  
50  
51  
52  
53  
54  
55  
56  
57  
58  
59

1  
2  
3 environmental and human resource factors and processes of neonatal care will also be  
4 collected and analyzed for association with outcomes. Clinical studies, including  
5  
6 randomized controlled trials will be conducted using the CHNN data platform.  
7  
8

9  
10 **Ethics and dissemination:** This study was approved by the ethics review board of  
11 Children's Hospital of Fudan University, which was recognized by all participating  
12 hospitals. Waiver of consent were granted at all sites. Only non-identifiable patient level  
13 data will be transmitted and only aggregate data will be reported in CHNN reports and  
14 publications.  
15  
16  
17  
18  
19  
20  
21  
22  
23

### 24 **Strengths and limitations of this study**

- 25  
26 1. This is the largest prospective, geographically representative, hospital-based cohort  
27 study of very preterm infants in China.  
28
- 29  
30 2. Data definitions and data collection protocols were standardized.  
31
- 32  
33 3. Data were collected on both outcomes and clinical practices to facilitate risk analysis  
34 and quality improvement.  
35  
36
- 37  
38 4. Limitations include lack of generalizability since participating hospitals were all  
39 tertiary hospitals.  
40  
41
- 42  
43 5. Outcomes data were not available for infants who were discharged against medical  
44 advice, which may bias the results  
45  
46  
47  
48  
49  
50  
51  
52  
53  
54  
55  
56  
57  
58  
59  
60

## 1. Introduction

Preterm infants are of significant public health concern worldwide due to their high risk of mortality and morbidities<sup>[1][2][3]</sup>. The incidence of preterm births at gestational age (GA) less than 32 weeks has increased steadily and approximately 0.2 million are born each year in China<sup>[4,5]</sup>. In October 2015, China announced a national plan to end the one-child policy that had been implemented for more than 40 years, allowing some couples to have two children. A national descriptive before-and-after comparative study showed that the announcement of China's universal two-child policy was associated with a rise in births in China, and with women giving birth being more likely to be multiparous and to be aged 35 and over<sup>[6]</sup>, with an increased likelihood of preterm births.

The population of China represents almost one fifth of the global population. In China, preterm infant survival in NICUs has significantly improved in recent years<sup>[7][8]</sup>. Neonatologists in China have made progress in NICU care, and introduced advances such as fresh human milk feeding<sup>[9]</sup>, NICU infection control<sup>[10]</sup>, family-integrated care of preterm infants<sup>[11]</sup>, and better treatment of bronchopulmonary dysplasia in very low birth weight infants<sup>[12]</sup>. However, previous studies mostly involved small groups of NICUs during a defined research period, and were subject to selection bias. This has led to problems of generalization in the context of the huge Chinese population with regional differences in population characteristics, medical expertise, economic development, and health insurance coverage. It also presents difficulties for translation of clinical evidence into expert consensus practice guidelines<sup>[13][14]</sup>, even though there is strong demand for them in China.

1  
2  
3 Previous authors have demonstrated that establishing a national neonatal network and  
4 database is an important step towards understanding the status of neonatal care and  
5 outcomes in a country and can provide an effective platform for collaborative care, quality  
6 improvement (QI), research and knowledge translation[15-19]. Our goal is to establish a  
7 national Chinese Neonatal Network (CHNN) in the People's Republic of China, with a  
8 standardized database for collaborative care, quality improvement and research. This  
9 manuscript outlines the research protocol for CHNN.  
10  
11  
12  
13  
14  
15  
16  
17  
18  
19  
20  
21

## 22 **2. Objectives**

23  
24 The specific objectives of CHNN are to: (1) Establish an on-going prospectively  
25 collected standardized database of very preterm infants (VPI) with GA <32 weeks or <1500  
26 grams birth weight among NICUs in China, as a platform for surveillance, quality  
27 improvement and research, (2) Assess and monitor major outcomes of VPI and their risk  
28 determinants, as well as inter-institutional variations in care practices and outcomes to  
29 identify clinical practices associated with good or poor outcomes, (3) Implement the  
30 Evidence-based Practice for Improving Quality (EPIQ) program to improve quality of care  
31 and outcomes, (4) Conduct collaborative research, including epidemiologic, clinical and  
32 health services studies and randomized controlled trials.  
33  
34  
35  
36  
37  
38  
39  
40  
41  
42  
43  
44  
45  
46

## 47 **3. Methods and analysis**

### 48 **3.1 Participating hospitals**

49  
50 CHNN was founded in 2018 with 58 participating hospitals from 25 provinces  
51 throughout mainland China (Figure 1). No hospitals in Tibet, Taiwan, and Hong Kong  
52  
53  
54  
55  
56  
57  
58  
59  
60



1  
2  
3 were included in CHNN. CHNN hospitals are tertiary referral hospitals with Grade A level  
4  
5 III NICUs authorized by the Health Administration of China and have recognized expertise  
6  
7 in caring for high-risk neonates. They were selected to be representative of different  
8  
9 regions of the country but do not include all hospitals providing NICU care to VPI, and  
10  
11 together they care for approximately 5% of all VPI in China. They include all government-  
12  
13 designated neonatal centers of excellence in China, including four national children's  
14  
15 medical centers, five regional children's medical centers and 30 provincial perinatal or  
16  
17 children's medical centers. The other 19 hospitals comprised major referral centers in large  
18  
19 cities across China. Forty-three hospitals were perinatal centers with birthing facilities, and  
20  
21 14 hospitals were freestanding children's hospitals that admitted only outborn infants. The  
22  
23 median number of NICU beds was 40 (interquartile range [IQR], 30-62), and the median number  
24  
25 of intermediate-level and continuing care neonatal beds was 66 (IQR, 40-91). For perinatal  
26  
27 centers, the median number of annual deliveries was 10 280 (IQR, 6273-15 423). The median  
28  
29 number of full- time equivalent neonatologists was 19 (IQR, 12-27), and the median number of  
30  
31 NICU nurses was 42 (IQR, 30-65)[20].  
32  
33  
34  
35  
36  
37  
38  
39

### 40 **3.2 Study population**

41  
42 This is a prospective, hospital-based cohort. Data will be collected on all infants  
43  
44 <32+0 weeks GA or birth weight <1500g admitted to participating NICUs. Stillborn,  
45  
46 delivery room death, and infants transferred to non-participating hospitals within 24 hours  
47  
48 after birth will be excluded. Readmissions and transfers between participating hospitals  
49  
50 will be tracked as data from the same infants. Infants will be followed until NICU  
51  
52 discharge/transfer or death.  
53  
54  
55  
56  
57  
58  
59  
60

### 3.3 Patient and public involvement

The study responds to patient concerns about quality of care and perceived variation in quality of care among different hospitals. Outcomes of quality improvement initiatives will be published and made available to patients.

### 3.4 Achieving the 4 specific objectives of CHNN

Objective 1. Establish an on-going prospectively collected standardized database

#### *Governance*

The executive committee of CHNN comprises 13 senior neonatology leaders representing different regions of the country and include 2 co-chairpersons, 2 vice-presidents, and 3 secretary generals. The committee is responsible for setting policies and research agendas, and oversees the activities and operations of the network and coordinating center.

#### *Coordinating Center and Data Collection*

The CHNN Coordinating and Data Centre is located at the Children's Hospital of Fudan University, Shanghai, China. The Data Center is equipped with dedicated servers that are managed by the Information Technology Department of the Children's Hospital of Fudan University in compliance with hospital, municipal and national standards for data security. A unique scalable customized database with built-in error checking based on MS Access was created in-house. A standard manual of operations and definitions was provided to all participating centers. Dedicated data abstractors under the supervision of the site principal investigator are responsible for data acquisition in each hospital and

centralized training sessions were organized to teach data abstractors to carry out data collection and uploading to the CHNN database. Data abstractors enter data directly from patients charts into a dedicated computer at each hospital and electronically transmitted data to the CHNN Coordinating Center. Only non-identifiable patient information will be transferred and only aggregate data results will be reported and published. Data quality is ensured at multiple levels. The data entry program has built-in error checking. Additional data checks are performed quarterly by the coordinating center for quality and completeness, and site-specific data quality reports will be fed back to each site and data records returned for corrections if needed. Data quality audit using data re-abstraction of randomly selected patient charts will be performed annually. Site investigators will be responsible for data quality control in each site. An annual report will be produced for the network.

### *Data Variables*

Data variables were selected by the CHNN executive committee (Table 1). Definitions of variables were standardized and mapped to the ICD-10[21] and SNOMED[22] dictionaries as appropriate. Table 1: CHNN data variables

| <b>Categories</b>         | <b>Variables</b>                                                                                                                                                                                                                                               |
|---------------------------|----------------------------------------------------------------------------------------------------------------------------------------------------------------------------------------------------------------------------------------------------------------|
| Demographic               | Birth weight Gestation, Sex, Ethnicity, SGA (Small for gestational age)                                                                                                                                                                                        |
| Obstetric/perinatal Risks | Maternal age Education, Smoking, Drugs in pregnancy, Antenatal care, Antenatal complications, Hypertension Preterm labor, Preterm rupture of membranes, Maternal diabetes, Group B Strep<br>Chorioamnionitis, Multiple gestation, Antenatal steroids, Delivery |

---

|              |                                                                                                                                                                                       |
|--------------|---------------------------------------------------------------------------------------------------------------------------------------------------------------------------------------|
|              | mode Presentation, Drug treatment, Delivery complications, Apgar score, Resuscitation                                                                                                 |
| NICU Care    | Admission illness severity (SNAP, TRIPS), Fluids, Nutrition, Assisted respiration, Antibiotics, Drug therapy, Intravenous lines, Catheters Procedures, Surgery                        |
| Outcomes     | (a) Primary - Survival without major morbidity (BPD, SNI, ROP, NEC, NI)<br>(b) Secondary outcomes – Death , BPD, SNI, ROP, NEC, NI, Patent ductus arteriosus (PDA), Air leak syndrome |
| Resource Use | Duration of hospitalization, Duration of ventilation, Duration of oxygen therapy, Use of central catheters, Parenteral nutrition, Surgery                                             |

---

Abbreviations: SNAP – Score for neonatal acute physiology, TRIPS – Transport risk index of physiologic stability, BPD – bronchopulmonary dysplasia, SNI – severe neurological injury, ROP – retinopathy of prematurity, NEC – necrotizing enterocolitis, NI – nosocomial infection

Mortality is defined as death due to any cause prior to discharge home. BPD is defined as oxygen requirement at 36 weeks post-menstrual age[23]. SNI is defined as  $\geq$  stage 3 intraventricular hemorrhage (IVH) with ventricular dilatation or parenchymal injury (including periventricular leukomalacia) with or without IVH, according to the Papile classification[24]. ROP is defined as  $\geq$  stage 3 according to the International Classification[25] or need for laser surgery or intraocular injections of anti-vascular

1  
2  
3 endothelial growth factor agents. NEC is defined as  $\geq$  stage 2 according to Bell's  
4 criteria[26]. NI is defined as culture-proven sepsis (blood or cerebrospinal fluid positive  
5 for pathogenic organism) at  $>3$  days or 72 hours postnatal age[27]. Hemodynamically  
6 significant PDA is defined as PDA requiring pharmacological treatment or surgical  
7 ligation[28].  
8  
9  
10  
11  
12  
13

14  
15  
16  
17 Objective 2. Assess and monitor major outcomes of VPI and their risk determinants, and  
18 inter-institutional variations in care and outcomes  
19

20  
21 Infant characteristics and outcomes will be summarized as counts and percentages for  
22 categorical variables and using the means and standard deviations or the medians and  
23 interquartile ranges for continuous variables. Sub-group analysis and inter-institutional  
24 comparisons will use the Chi-square test for categorical variables and ANOVA F-test or  
25 Mood's median test for continuous variables. Multivariable logistic regression models with  
26 adjustment for confounders will be used to assess risk factors associated with outcomes.  
27  
28  
29  
30  
31  
32  
33  
34

35 To study inter-institutional variations in primary and secondary outcomes, the ratios  
36 and associated 95% confidence intervals (CI) will be calculated, and 'caterpillar plots' will  
37 be used to graphically display differences between participating sites. The 'indirect  
38 standardization' approach will be used to compute the standardized outcome ratios in order  
39 to adjust for multiple baseline characteristics. Each NICU can compare its own observed  
40 rate with the average CHNN rate to identify the relative level of its own unit. For each  
41 outcome, the expected number of events will be computed as the sum of predicted  
42 probabilities from a multivariable model (logistic regression or zero inflated negative  
43 binomial models based on data distribution) derived using data from all NICUs with  
44  
45  
46  
47  
48  
49  
50  
51  
52  
53  
54  
55  
56  
57  
58  
59  
60

1  
2  
3 adjustment for confounders. NICU standardized outcome ratios will be graphically  
4 displayed using ‘funnel’ plots with 95% prediction intervals for comparison between  
5 NICUs. Pair-wise comparisons between NICUs will be performed using multivariate  
6 regression models adjusted for confounders. The generalized estimating equation (GEE)  
7 models will be used for adjusting analyses for infant cluster within the CHNN. Hierarchical  
8 random-effects regression models will be used to allow for variation at unit level. In  
9 addition, statistical significance will be evaluated by applying a Bonferroni correction to  
10 account for multiple pair-wise comparisons.  
11  
12  
13  
14  
15  
16  
17  
18  
19  
20

21 Associations of clinical practices and other factors with outcomes will be assessed  
22 under the general framework of individual patient-level data meta-analyses. Random-  
23 effects models with adjustment for confounding variables and important risk factors will  
24 be used to assess the association and residual variation due to unknown or unmeasured  
25 unit-specific factors. These analyses will identify treatment practices and health care  
26 services with significant effects on outcomes, which subsequently can be targeted for  
27 implementation or improvement. Analyses (two-sided tests) based on 10,000 yearly  
28 admissions evaluating the effects of treatments or practices (assuming 50% exposure) on  
29 outcomes (incidence 1% to 40%) will be able to detect relative risks of 1.6 to 1.1 with a  
30 statistical power of 80% and type I error rate of 5%. This power calculation is based on the  
31 anticipated data collection by CHNN during the first year. Safety and outcome  
32 improvements will be monitored within each unit using control charts and Chi-square tests  
33 for differences from baseline in outcome rates. Multivariable logistic regression analyses  
34 will pool data from units within CHNN network to assess changes in outcomes over time  
35  
36  
37  
38  
39  
40  
41  
42  
43  
44  
45  
46  
47  
48  
49  
50  
51  
52  
53  
54  
55  
56  
57  
58  
59  
60

1  
2  
3 with adjustment for potential confounders and important risk factors and accounting for  
4  
5 clustering.  
6  
7  
8  
9

10 Objective 3. Implement Evidence-based Practice for Improving Quality (EPIQ) program  
11  
12 to improve quality of care and outcomes  
13

14 EPIQ is a multi-faceted system for quality improvement that facilitates  
15 implementation of practice change[29]. EPIQ is based on 3 features: (a) systematic review  
16  
17 of evidence in the published literature, (b) quantitative and qualitative analysis of outcomes  
18  
19 and practices to identify practices associated with good or poor outcomes for targeted  
20  
21 change, and (c) use of a collaborative network of clinicians, researchers and administrators  
22  
23 to facilitate mutual learning and implement change. In Shanghai, Cao et al. [30]  
24  
25 demonstrated in the multi-center EPIQ-REIN study, that over a 1-year period, EPIQ  
26  
27 reduced the rate of ventilator associated pneumonia from 48.84 per 1,000 ventilator-days  
28  
29 to 18.50 per 1,000 ventilator-days ( $P<0.001$ ), and rates of central line associated blood  
30  
31 stream infection (CLABSI) from 16.7 per 1,000 central line days to 5.2 per 1,000 central  
32  
33 line days ( $P<0.01$ ).  
34  
35  
36  
37  
38  
39

40 After the first year of data collection (baseline data), we will implement EPIQ in all  
41  
42 CHNN NICUs and compare the results pre and post EPIQ implementation. The EPIQ  
43  
44 program has well established published protocols for training of personnel, coordination,  
45  
46 literature review, risk analysis, identification of target outcomes, implementation and  
47  
48 facilitation of practice changes, monitoring and surveillance, communication and safety  
49  
50 assurance; and CHNN has well trained personnel, teams and organization from the  
51  
52 previous EPIQ-REIN experience[30]. A national CHNN infrastructure for collaborative  
53  
54  
55  
56  
57  
58  
59  
60

1  
2  
3 quality improvement will be established. Hospitals will be organized into groups that target  
4 specific outcomes. Multi-disciplinary groups will examine the literature, conduct  
5 systematic reviews and examine hospital specific data in China to develop practice  
6 guidelines and bundles of best practices for implementation in CHNN NICUs. Quarterly  
7 cycles of practice change will be introduced using PDSA (Plan-Do-Study-Act) cycles of  
8 rapid change, and outcomes will be monitored quarterly and results fed back to hospitals.  
9  
10 An online Teaching & Communication web portal will be used to facilitate collaboration  
11 between sites, including site visits, discussions and planning.. Safety will be monitored.  
12  
13 Multivariable logistic regression analyses will pool data from units to assess changes in  
14 outcomes over time with adjustment for potential confounders and important practice  
15 related risk factors, which will be targeted for practice change.  
16  
17  
18  
19  
20  
21  
22  
23  
24  
25  
26  
27  
28  
29  
30

31 Objective 4. Conduct collaborative research, including epidemiologic, clinical and health  
32 services studies and randomized controlled trials.  
33  
34

35 The CHNN database platform will support additional research initiatives, including  
36 epidemiologic, clinical and health services and randomized controlled trials. Research  
37 projects can be initiated by any CHNN member, approved by the CHNN Scientific  
38 Advisory Committee, and coordinated through the CHNN Coordinating Centre, where data  
39 will also be collected and analyzed. In future stages, limited datasets may be released to  
40 investigators using a secure electronic portal system.  
41  
42  
43  
44  
45  
46  
47  
48  
49  
50

### 51 **3.5 Statistical analysis**

52  
53  
54  
55  
56  
57  
58  
59  
60



1  
2  
3 All analyses of cohort data will be performed by a team of statisticians (including  
4 PhD and MSc statisticians) at the CHNN coordinating center, under the leadership of the  
5 CHNN Secretary General supervising the center. For specific research projects, relevant  
6 data may be released to the responsible research group for their analysis. Participating sites  
7 may perform analysis of their own individual site data.  
8  
9  
10  
11  
12  
13  
14  
15  
16

#### 17 **4. Ethics and dissemination**

18  
19 Central ethics approval was obtained from the Ethics Committee of the Children's  
20 Hospital of Fudan University (#CHFUFU 2018-296) and recognized by all participating sites.  
21 All participating sites have signed data transfer agreements with the CHNN Coordinating  
22 Centre and obtained ethics approval from their affiliated institutions or hospitals to allow  
23 sending de-identified data to the CHNN Coordinating Centre in compliance with national,  
24 provincial and local hospital regulations for ensuring patient privacy and confidentiality,  
25 and are consistent with international standards. All CHNN studies will not take individual  
26 patients, and waiver of consent were granted at all sites. The results of this registry will be  
27 disseminated by 3 methods: (1) An annual report will be published and provided to  
28 participating hospitals and regional health authorities. (2) Results will be reported at  
29 national and international scientific meetings. (3) Results will be published in domestic and  
30 international scientific journals.  
31  
32  
33  
34  
35  
36  
37  
38  
39  
40  
41  
42  
43  
44  
45  
46  
47  
48  
49

#### 50 **5. Discussion**

51  
52 The CHNN collaboration will be the first national network to examine data from a  
53 large cohort of preterm infants that is representative of the different regions of China on an  
54  
55  
56  
57  
58  
59  
60

1  
2  
3 on-going basis. This is important because China has a huge population, with many regional  
4 differences in social, economic and health care development. Unfortunately, the existing  
5 literature regarding preterm infants in China has been mostly limited to single-centre  
6 studies or multicentre studies with small numbers of participating sites[8,10,30, 31].  
7 Findings from this national collaboration will provide a comprehensive picture of outcomes  
8 of very preterm infants in Chinese NICUs and establish a strong system for outcomes  
9 surveillance and monitoring trends in clinical practices and outcome variations. Data from  
10 CHNN will also provide robust estimates for development of clinical practice guidelines  
11 and health care recommendations that can be generalizable across the country.  
12  
13  
14  
15  
16  
17  
18  
19  
20  
21  
22  
23

24 Quality improvement is a key goal, especially for China where neonatal care is still  
25 developing and there is significant room for improvement. The adoption of EPIQ will  
26 provide a robust system for quality improvement in Chinese NICUs. EPIQ was pioneered  
27 by the Canadian Neonatal Network, where Lee et al [29] first demonstrated 44% reduction  
28 in nosocomial infection and 15% reduction in bronchopulmonary dysplasia in a multi-  
29 center randomized controlled trial, and EPIQ is now practiced in all Canadian NICUs. In a  
30 comparative study of outcomes by the International Network for Evaluation of Outcomes  
31 (iNEO), the implementation of EPIQ nationally was credited with rapidly improving  
32 neonatal outcomes in Canada in comparison with other countries[32,33]. Subsequent  
33 studies in Canada and China provided confirmation of its efficacy[34-36]. Since Chinese  
34 NICUs have experience using EPIQ, this will facilitate its implementation in Chinese  
35 NICUs and provide a proven method for improving quality of care and outcomes in China.  
36  
37 However, we recognize that change can be difficult to implement, especially those that  
38 require making financial investments, adding staff, or breaking cultural traditions.  
39  
40  
41  
42  
43  
44  
45  
46  
47  
48  
49  
50  
51  
52  
53  
54  
55  
56  
57  
58  
59  
60

1  
2  
3 Notwithstanding possible early reluctance to follow these recommendations, the strength  
4 of evidence produced from the data, the pragmatic nature of the results, and the examples  
5 provided by “early adopter” NICUs will be the most persuasive elements of the CHNN  
6 collaboration.  
7  
8  
9  
10

11  
12 The flexibility of the CHNN data platform to accommodate additional studies like  
13 randomized controlled trials provides a unique opportunity for Chinese NICUs. China has  
14 a large population, which is conducive to conducting multi-center studies rapidly and  
15 efficiently. Once the CHNN data platform is fully functional, we anticipate that China will  
16 play a leading role in conducting large scale multi-center studies and clinical trials.  
17  
18  
19  
20  
21  
22

23  
24 Limitations of CHNN are: (1) The data are from a select group of large tertiary NICUs  
25 with the highest level of neonatal care in China, and may not be generalizable to the whole  
26 population. (2) Data on parent participation, pain management, skin-to-skin contact care  
27 and other important developmental aspects of modern neonatal care are not currently  
28 available but will be included in the future (3) Data on resource use is limited.  
29  
30  
31  
32  
33  
34  
35  
36  
37

38 In summary, the CHNN collaboration will serve as a strong national platform for  
39 collaborative research, outcomes evaluation, and quality improvement for VPI in China.  
40 The knowledge generated will have potential to benefit infants and families in China and  
41 internationally.  
42  
43  
44  
45  
46  
47  
48  
49

#### 50 **Author Contributions:**

51  
52  
53 Study concept and design: Shoo K Lee, Chen Chao, Mingyan Hei  
54

55  
56 Drafting of the manuscript: Mingyan Hei, Shoo K Lee  
57  
58  
59  
60

1  
2  
3 Critical revision of the manuscript for important intellectual content: All authors  
4  
5

6 Statistical analysis: Yanchen Wang  
7

8  
9 Study supervision: Mingyan Hei, Chao Chen, Shoo K Lee, Wenhao Zhou, Lizhong Du  
10  
11  
12  
13  
14

15 **Group Information: Chairmen:** Shoo K. Lee, MBBS, Mount Sinai Hospital, University  
16 of Toronto; Chao Chen, MD, Children's Hospital of Fudan University. **Vice-Chairmen:**  
17 Lizhong Du, MD, Children's Hospital of Zhejiang University School of Medicine; Wenhao  
18 Zhou, Children's Hospital of Fudan University. **Site investigators of the Chinese**  
19 **Neonatal Network:** Children's Hospital of Fudan University: Yun Cao, MD; The Third  
20 Affiliated Hospital of Zhengzhou University: Falin Xu, MD; Tianjin Obstetrics &  
21 Gynecology Hospital: Xiuying Tian, MD; Guangzhou Women and Children's Medical  
22 Center: Huayan Zhang, MD; Children's Hospital of Shanxi: Yong Ji, MD; Northwest  
23 Women's and Children's Hospital: Zhankui Li, MD; Gansu Provincial Maternity and Child  
24 Care Hospital: Bin Yi, MD; Shengjing Hospital of China Medical University: Xindong  
25 Xue, MD; Shenzhen Maternity and Child Health Care Hospital: Chuanzhong Yang, MD;  
26 Quanzhou Women and Children's Hospital: Dongmei Chen, MD; Suzhou Municipal  
27 Hospital affiliated to Nanjing Medical University: Sannan Wang, MD; Guizhou Women  
28 and Children's Hospital/Guiyang Children's Hospital: Ling Liu, MD; Hunan Children's  
29 Hospital: Xirong Gao, MD; The First Bethune Hospital of Jilin University: Hui Wu, MD;  
30 Fujian Maternity and Child Health Hospital, Affiliated Hospital of Fujian Medical  
31 University: Changyi Yang, MD; Nanjing Maternity and Child Health Care Hospital:  
32 Shuping Han, MD; Qingdao Women and Children's Hospital: Ruobing Shan, MD; The  
33  
34  
35  
36  
37  
38  
39  
40  
41  
42  
43  
44  
45  
46  
47  
48  
49  
50  
51  
52  
53  
54  
55  
56  
57  
58  
59  
60

1  
2  
3 Affiliated Hospital of Qingdao University: Hong Jiang, MD; Children's Hospital of  
4 Shanghai: Gang Qiu, MD; Women and Children's Hospital of Guangxi Zhuang  
5 Autonomous Region: Xinnian Pan, MD; Children's Hospital of Nanjing Medical  
6 University: Youyan Zhao, MD; Henan Children's Hospital: Wenqing Kang, MD; The First  
7 Affiliated Hospital of Xinjiang Medical University: Mingxia Li, MD; Foshan Women and  
8 Children's Hospital: Xuqiang Ye, MD; The First Affiliated Hospital of Anhui Medical  
9 University: Lili Wang, MD; Shanghai First Maternity and Infant Hospital: Jiangqin Liu  
10 MD; Yuying Children's Hospital Affiliated to Wenzhou Medical University: Zhenlang Lin,  
11 MD; Children's Hospital of Chongqing Medical University: Yuan Shi, MD; The First  
12 Affiliated Hospital of Zhengzhou University: Xiuyong Cheng, MD; The First Affiliated  
13 Hospital of USTC, Division of Life Sciences and Medicine, University of Science and  
14 Technology of China: Jiahua Pan, MD; Shaanxi Provincial People's Hospital: Qin Zhang,  
15 MD; Children's Hospital of Soochow University: Xing Feng, MD; Wuxi Maternity and  
16 Child Healthcare Hospital: Qin Zhou, MD; People's Hospital of Xinjiang Uygur  
17 Autonomous Region: Long Li, MD; The Second Xiangya Hospital of Central South  
18 University: Pingyang Chen, MD; Qilu Children's Hospital of Shandong University:  
19 Xiaoying Li, MD; Hainan Women and Children's Hospital: Ling Yang, MD; Xiamen  
20 Children's Hospital: Deyi Zhuang, MD; Xinhua Hospital affiliated to Shanghai Jiao Tong  
21 University School of Medicine: Yongjun Zhang, MD; Shanghai Children's Medical Center  
22 , Shanghai Jiao Tong University School of Medicine: Jianhua Sun, MD; Shenzhen  
23 Children's Hospital: Jinxing Feng, MD; Children's Hospital Affiliated to Capital Institute  
24 of Pediatrics: Li Li, MD; Women and Children's Hospital, School of Medicine, Xiamen  
25 university: Xinzhu Lin, MD; General Hospital of Ningxia Medical University: Yinping

1  
2  
3 Qiu, MD; First Affiliated Hospital of Kunming Medical University: Kun Liang, MD; Hebei  
4  
5 Provincial Children's Hospital: Li Ma, MD; Jiangxi Provincial Children's Hospital: Liping  
6  
7 Chen, MD; Fuzhou Children's Hospital of Fujian Province: Liyan Zhang, MD; First  
8  
9 Affiliated Hospital of Xian Jiao Tong University: Hongxia Song, MD; Dehong people's  
10  
11 Hospital of Yunnan Province: Zhaoqing Yin, MD; Beijing Children's Hospital, Capital  
12  
13 Medical University: Mingyan Hei, MD; Zhuhai Center for Maternal and Child Health Care:  
14  
15 Huiwen Huang, MD; Guangdong Women and Children's Hospital: Jie Yang, MD; Dalian  
16  
17 Municipal Women and Children's Medical Center: Dong Li, MD; Peking Union Medical  
18  
19 College Hospital: Guofang Ding, MD; Obstetrics & Gynecology Hospital of Fudan  
20  
21 University: Jimei Wang, MD; Shenzhen Hospital of Hongkong University: Qianshen  
22  
23 Zhang, MD; Children's Hospital of Zhejiang University School of Medicine: Xiaolu Ma,  
24  
25 MD. **Advisor:** Joseph Ting, MBBS; University of Alberta  
26  
27  
28  
29  
30  
31  
32  
33

## 34 **Acknowledgements**

35  
36  
37 We would like to deeply thank Prof. Jianxing Zhu, Prof. Dezhi Mu, and Prof. Xing  
38  
39 Feng for their dedicated support of the Chinese Neonatal Network. We would also like to  
40  
41 thank Heather McDonald Kinkaid, PhD, from the Maternal-Infant Care Research Centre  
42  
43 (MiCare) at Mount Sinai Hospital in Toronto, Canada, for editorial assistance; and Xiang  
44  
45 Y. Ye, MSc, from the MiCare, for ongoing statistical supervision. MiCare is supported by  
46  
47 the Canadian Institutes of Health Research and the Ontario Ministry of Health and Long-  
48  
49 Term Care. We also thank all staffs from participating hospitals of the CHNN.  
50  
51  
52  
53  
54

## 55 **References**

- 1  
2  
3 1. da Cunha Durães MI, Flor-De-Lima F, Rocha G, Soares H, Guimarães H. Morbidity  
4 and mortality of preterm infants less than 26 weeks of gestational age. *Minerva Pediatr.*  
5  
6 2019;71(1):12-20. doi:10.23736/S0026-4946.16.04609-0.  
7  
8
- 9  
10 2. Huff K, Rose RS, Engle WA. Late preterm infants: morbidities, mortality, and  
11 management recommendations. *Pediatr Clin North Am.* 2019;66(2):387-402.  
12  
13 doi:10.1016/j.pcl.2018.12.008.  
14
- 15 3. Richter LL, Ting J, Muraca GM, Synnes A, Lim KI, Lisonkova S. Temporal trends in  
16 neonatal mortality and morbidity following spontaneous and clinician-initiated preterm  
17 birth in Washington State, USA: a population-based study. *BMJ Open.*  
18  
19 2019;9(1):e023004. doi:10.1136/bmjopen-2018-023004.  
20  
21
- 22 4. National Bureau of Statistics Population. Population. China statistic yeat book 2019.  
23  
24 Accessed November 30, 2020. <http://www.stats.gov.cn/tjsj/ndsj/2019/indexch.htm>  
25
- 26 5. Chen C, Zhang JW, Xia HW, et al. Preterm birth in china between 2015 and 2016. *Am*  
27  
28 *J Public Health.* 2019;109(11):1597-1604. doi:10.2105/AJPH.2019.305287  
29
- 30 6. Li HT, Xue M, Hellerstein S, Cai Y, Gao Y, Zhang Y, et al. Association of China's  
31  
32 universal two child policy with changes in births and birth related health factors:  
33 national, descriptive comparative study. *BMJ.* 2019;366:l4680. doi:10.1136/bmj.l4680.  
34  
35
- 36 7. Shah PS, Sankaran K, Aziz K, Allen AC, Seshia M, Ohlsson A, Lee SK: Outcomes of  
37  
38 preterm infants <29 weeks gestation over 10-year period in Canada: a cause for  
39  
40 concern? *J Perinatol* 2012, 32:132-138  
41  
42
- 43 8. Li SJ, Yan SY, Zhou Y, Han KL, Guo WL, Xia Q, et al. Ventilator-associated  
44  
45 pneumonia among premature infants <34 weeks' gestational age in neonatal intensive  
46  
47 care unit in China: a multicenter study. *Chin J Pediatr.* 2017; 55(3):182-7  
48  
49
- 50  
51  
52  
53  
54  
55  
56  
57  
58  
59  
60

- 1  
2  
3 9. Huiqing Sun, Shuping Han, Rui Cheng, Mingyan Hei, Foteini Kakulas, Shoo K. Lee.  
4  
5 Testing the feasibility and safety of feeding preterm infants fresh mother's own milk in  
6  
7 the NICU: A pilot study. *Scientific Reports* 2019;9:941-949  
8  
9
- 10 10. Jiang S, Yang Z, Shan R, Zhang Y, Yan W, Yang Y, et al. Neonatal outcomes following  
11  
12 culture-negative late-onset sepsis among preterm infants. *Pediatr Infect Dis J*.  
13  
14 2020;39(3):232-238. doi:10.1097/inf.0000000000002558.  
15  
16
- 17 11. Hei M, Gao X, Gao X, et al. Is family integrated care in neonatal intensive care units  
18  
19 feasible and good for preterm infants in China: study protocol for a cluster randomized  
20  
21 controlled trial. *Trials*. 2016;17:22. doi:10.1186/s13063-015-1152-9  
22  
23
- 24 12. Jiangsu Multicenter Study Collaborative Group for Breastmilk Feeding in Neonatal  
25  
26 Intensive Care Units. Clinical characteristics and risk factors of very low birth weight  
27  
28 infants with bronchopulmonary dysplasia: multicenter retrospective analysis [in  
29  
30 Chinese]. *Chin J Pediatr*, 2019,57(1):33-39 DOI:10.3760/cma.j.issn.0578-  
31  
32 1310.2019.01.009  
33  
34
- 35 13. The Subspecialty Group of Neonatology, the Society of Pediatrics, Chinese Medical  
36  
37 Association; the Editorial Board, Chinese Journal of Pediatrics. Expert consensus on  
38  
39 clinical management of premature infants with Bronchopulmonary dysplasia [Chinese].  
40  
41 *Chin J Pediatr*, 2020,58(05):358-365. DOI: 10.3760/cma.j.cn112140-20200317-00254  
42  
43  
44
- 45 14. Experts Working Group on Consensus on the Use of Human Milk Fortifier in Preterm  
46  
47 Infants; Editorial Board Committee of Chinese Journal of Neonatology. Consensus on  
48  
49 the use of human milk fortifier for preterm infants [in Chinese]. *Chin J Neonatol*,  
50  
51 2019,34(5):321-328. DOI: 10.3760/cma.j.issn.2096-2932.2019.05.001  
52  
53
- 54 15. Rochow N, Landau-Crangle E, Lee S, Schünemann H, Fusch C. Quality Indicators but  
55  
56  
57  
58  
59  
60



- 1  
2  
3 Not Admission Volumes of Neonatal Intensive Care Units Are Effective in Reducing  
4 Mortality Rates of Preterm Infants. PLoS One. 2016;11(8):e0161030.  
5  
6 doi:10.1371/journal.pone.0161030  
7  
8  
9
- 10 16. Lee SK, McMillan DD, Ohlsson A, Pendray M, Synnes A, Whyte R, Chien LY, Sale  
11 J: Variations in practice and outcomes in the Canadian NICU network: 1996–1997.  
12 Pediatrics 2000, 106:1070-1079  
13  
14  
15  
16
- 17 17. Fellman V, Hellstrom-Westas L, Norman M, Westgren M, Kallen K, Lagercrantz H,  
18 Marsal K, Serenius F, Wennergren M: One-year survival of extremely preterm infants  
19 after active perinatal care in Sweden. JAMA 2009, 301:2225-2233  
20  
21  
22  
23
- 24 18. Bader D, Kugelman A, Boyko V, Levitzki O, Lerner-Geva L, Riskin A, Reichman B:  
25 Risk factors and estimation tool for death among extremely premature infants: a  
26 national study. Pediatrics 2010, 125:696-703  
27  
28  
29  
30
- 31 19. Gale C, Santhakumaran S, Nagarajan S, Statnikov Y, Modi N: Impact of managed  
32 clinical networks on NHS specialist neonatal services in England: population based  
33 study. BMJ 2012, 344:e2105  
34  
35  
36  
37
- 38 20. Cao Y, Jiang S, Sun J, Hei M, Wang L, Zhang H, Ma X, Wu H, Li X, Sun H, Zhou W, Shi Y,  
39 Wang Y, Gu X, Yang T, Lu Y, Du L, Chen C, Shoo K. Lee, Zhou W; for the Chinese Neonatal  
40 Network. Assessment of Neonatal Intensive Care Unit Practices, Morbidity, and Mortality  
41 Among Very Preterm Infants in China. JAMA Network Open. 2021;4(8):e2118904.  
42  
43  
44  
45  
46  
47  
48  
49
- 50 21. World Health Organization: International Statistical Classification of Diseases and  
51 Related Health Problems 10th Revision (ICD-10). 2010.  
52  
53  
54 <http://apps.who.int/classifications/icd10/browse/2010/en> website  
55  
56  
57  
58  
59  
60

- 1  
2  
3 22. International Health Terminology Standards Development Organisation. SNOMED  
4 CT. 2012. <http://www.ihtsdo.org/snomed-ct/>  
5  
6  
7  
8 23. Shennan AT, Dunn MS, Ohlsson A, et al. Abnormal pulmonary outcomes in premature  
9 infants: prediction from oxygen requirement in the neonatal period. *Pediatrics*  
10 1988;82:527-32.  
11  
12  
13  
14 24. Papile LA, Burstein J, Burstein R, et al. Incidence and evolution of subependymal and  
15 intraventricular hemorrhage: a study of infants with birth weights less than 1,500 gm.  
16 *J Pediatr* 1978;92:529-34.  
17  
18  
19  
20  
21 25. The International Classification of Retinopathy of Prematurity revisited. *Arch*  
22 *Ophthalmol* 2005;123:991-9.  
23  
24  
25  
26 26. Bell MJ, Ternberg JL, Feigin RD, et al. Neonatal necrotizing enterocolitis. Therapeutic  
27 decisions based upon clinical staging. *Ann Surg* 1978;187:1-7.  
28  
29  
30  
31 27. Freeman J, Epstein MF, Smith NE, Platt R, Sidebottom DG, Goldmann DA: Extra  
32 hospital stay and antibiotic usage with nosocomial coagulase-negative staphylococcal  
33 bacteremia in two neonatal intensive care unit populations. *Am J Dis Child* 1990,  
34 144:324-329.  
35  
36  
37  
38  
39  
40 28. Jasani B, Weisz DE, McNamara PJ. Evidence-based use of acetaminophen for  
41 hemodynamically significant ductus arteriosus in preterm infants. *Semin*  
42 *Perinatol.* 2018;42(4):243-252  
43  
44  
45  
46  
47 29. Lee SK, Aziz K, Singhal N, Cronin CM, James A, Lee DS, Matthew D, Ohlsson A,  
48 Sankaran K, Seshia M, Synnes A, Walker R, Whyte R, Langley J, Macnab YC, Stevens  
49 B, von Dadelszen P: Improving the quality of care for infants: a cluster randomized  
50 controlled trial. *CMAJ* 2009, 181:469-476  
51  
52  
53  
54  
55  
56  
57  
58  
59  
60

- 1  
2  
3 30. Cao Y, Jiang SY, Zhou Q. Introducing evidence-based practice improvement in  
4 Chinese neonatal intensive care units, *Transl Pediatr.* 2019 Jul; 8(3): 257–261. doi:  
5  
6 10.21037/tp.2019.07.07  
7  
8  
9  
10 31. REIN-EPIQ Study Group. Outcomes of very low birth weight infants at discharge: a  
11 multicentered cross-sectional study of 25 tertiary neonatal intensive care units in China  
12 [Chinese]. *Chin J Peirnat Med.* 2018;21(6):294-400  
13  
14  
15  
16 32. Prakesh S Shah, Shoo K Lee, Kei Lui, Gunnar Sjörs, Rintaro Mori, Brian Reichman,  
17 et al and on behalf of the International Network for Evaluating Outcomes of Neonates  
18 (iNeo). The International Network for Evaluating Outcomes of very low birth weight,  
19 very preterm neonates (iNeo): a protocol for collaborative comparisons of international  
20 health services for quality improvement in neonatal care. *BMC Pediatrics* 2014, 14:110  
21 doi:10.1186/1471-2431-14-110  
22  
23  
24  
25  
26  
27  
28  
29  
30 33. Lui K, Lee SK, Kusuda S, Adams M, Vento M, Reichman B, Darlow BA, Lehtonen L,  
31 Modi N, Norman M, Håkansson S, Bassler D, Rusconi F, Lodha A, Yang JM, Shah  
32 PS, iNeo Investigators. Trends in neonatal outcomes for very preterm and very low  
33 birth weight neonates in 11 countries. *J Pediatr* 2019;215:32–40.e14. DOI:  
34 10.1016/j.jpeds.2019.08.020  
35  
36  
37  
38  
39  
40  
41  
42 34. Lee SK, Aziz K, Singhal N, Cronin CM. The Evidence-based Practice for Improving  
43 Quality method has greater impact on improvement of outcomes than dissemination of  
44 practice change guidelines and quality improvement training in neonatal intensive care  
45 units. *Paediatr Child Health.* 2015;20(1):e1-e9.  
46  
47  
48  
49  
50  
51 35. Lee SK, Shah PS, Singhal N, et al. Association of a quality improvement program with  
52 neonatal outcomes in extremely preterm infants: a prospective cohort study. *CMAJ.*  
53  
54  
55  
56  
57  
58  
59  
60

1  
2  
3 2014;186(13):E485 - E494. doi:10.1503/cmaj.140399  
4

- 5  
6 36. Cronin CM, Baker GR, Lee SK, et al. Reflections on knowledge translation in Canadian  
7  
8 NICUs using the EPIQ method. Healthc Q. 2011;14 Spec No 3:8-16.  
9  
10 doi:10.12927/hcq.2011.22539  
11  
12  
13  
14  
15  
16  
17  
18  
19  
20  
21  
22  
23  
24  
25  
26  
27  
28  
29  
30  
31  
32  
33  
34  
35  
36  
37  
38  
39  
40  
41  
42  
43  
44  
45  
46  
47  
48  
49  
50  
51  
52  
53  
54  
55  
56  
57  
58  
59  
60

For peer review only

## Figure legend

### Figure 1. Map of 58 participating hospitals in Chinese Neonatal Network

There were 58 member hospitals from 25 provinces in China that are participating in the CHNN. The distribution of the 58 member hospitals is almost geographically throughout the mainland China.

## Word Count

2951 words

For peer review only

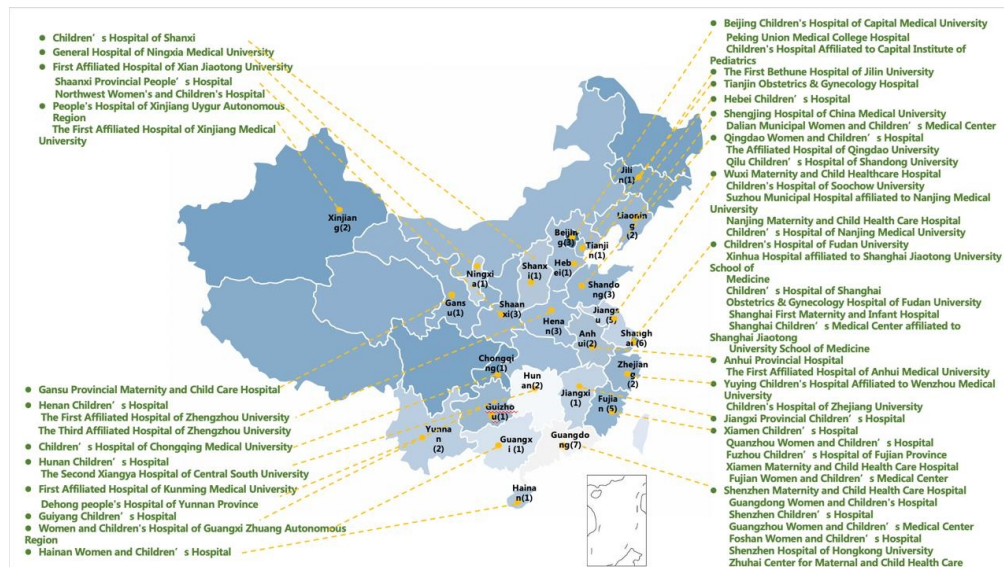

Figure 1. Map of 58 participating hospitals in Chinese Neonatal Network  
 There were 58 member hospitals from 25 provinces in China that are participating in the CHNN. The distribution of the 58 member hospitals is almost geographically throughout the mainland China.

146x82mm (220 x 220 DPI)

# BMJ Open

## The Chinese Neonatal Network: a national protocol for collaborative research and quality improvement in neonatal care

|                                 |                                                                                                                                                                                                                                                                                                                                                                                                                                                                                                                                                                                                                                                                                                                                                                                                                                                                                                                                                                                                                                                                                                                                                                                                                                                                                                                                                                                                                                                                                                                                                                                                                                                                                                                        |
|---------------------------------|------------------------------------------------------------------------------------------------------------------------------------------------------------------------------------------------------------------------------------------------------------------------------------------------------------------------------------------------------------------------------------------------------------------------------------------------------------------------------------------------------------------------------------------------------------------------------------------------------------------------------------------------------------------------------------------------------------------------------------------------------------------------------------------------------------------------------------------------------------------------------------------------------------------------------------------------------------------------------------------------------------------------------------------------------------------------------------------------------------------------------------------------------------------------------------------------------------------------------------------------------------------------------------------------------------------------------------------------------------------------------------------------------------------------------------------------------------------------------------------------------------------------------------------------------------------------------------------------------------------------------------------------------------------------------------------------------------------------|
| Journal:                        | <i>BMJ Open</i>                                                                                                                                                                                                                                                                                                                                                                                                                                                                                                                                                                                                                                                                                                                                                                                                                                                                                                                                                                                                                                                                                                                                                                                                                                                                                                                                                                                                                                                                                                                                                                                                                                                                                                        |
| Manuscript ID                   | bmjopen-2021-051175.R2                                                                                                                                                                                                                                                                                                                                                                                                                                                                                                                                                                                                                                                                                                                                                                                                                                                                                                                                                                                                                                                                                                                                                                                                                                                                                                                                                                                                                                                                                                                                                                                                                                                                                                 |
| Article Type:                   | Protocol                                                                                                                                                                                                                                                                                                                                                                                                                                                                                                                                                                                                                                                                                                                                                                                                                                                                                                                                                                                                                                                                                                                                                                                                                                                                                                                                                                                                                                                                                                                                                                                                                                                                                                               |
| Date Submitted by the Author:   | 11-Nov-2021                                                                                                                                                                                                                                                                                                                                                                                                                                                                                                                                                                                                                                                                                                                                                                                                                                                                                                                                                                                                                                                                                                                                                                                                                                                                                                                                                                                                                                                                                                                                                                                                                                                                                                            |
| Complete List of Authors:       | <p>Hei, Mingyan; Beijing Children's Hospital Capital Medical University, Neonatal Center; National Center for Children's Health, Neonatal Center<br/>         Li, Xiaoying; Qilu Children's Hospital of Shandong University<br/>         Shi, Yuan; Children's Hospital of Chongqing Medical University, Department of Neonatology<br/>         Cao, Yun; Children's Hospital of Fudan University, Neonatology<br/>         Sun, Jianhua; Shanghai Children's Medical Center, Shanghai Jiao Tong University School of Medicine<br/>         Wu, Hui; The First Bethune Hospital of Jilin University, Neonatology<br/>         Jiang, Siyuan; Children's Hospital of Fudan University<br/>         Ma, Xiaolu; The Children's Hospital Zhejiang University School of Medicine, Neonatology<br/>         Wang, Yanchen; Children's Hospital of Fudan University<br/>         Sun, Huiqing; Children's Hospital Affiliated to Zhengzhou University, Division of Neonatology; Children's Hospital of Henan Zhengzhou<br/>         Zhang, Huayan; Guangzhou Women and Children's Medical Center, Division of Neonatology and Center for Newborn Care; Children's Hospital of Philadelphia and University of Pennsylvania Perelman School of Medicine, Department of Pediatrics<br/>         Du, Li-Zhong ; The Children's Hospital Zhejiang University School of Medicine<br/>         Zhou, Wenhao; Children's Hospital of Fudan University<br/>         Lee, Shoo; University of Toronto, Department of Pediatrics; University of Toronto, Department of Obstetrics and Gynecology and Dalla Lana School of Public Health<br/>         Chen, Chao; Children's Hospital of Fudan University, Department of Neonatology</p> |
| <b>Primary Subject Heading</b>: | Epidemiology                                                                                                                                                                                                                                                                                                                                                                                                                                                                                                                                                                                                                                                                                                                                                                                                                                                                                                                                                                                                                                                                                                                                                                                                                                                                                                                                                                                                                                                                                                                                                                                                                                                                                                           |
| Secondary Subject Heading:      | Paediatrics, Epidemiology, Intensive care                                                                                                                                                                                                                                                                                                                                                                                                                                                                                                                                                                                                                                                                                                                                                                                                                                                                                                                                                                                                                                                                                                                                                                                                                                                                                                                                                                                                                                                                                                                                                                                                                                                                              |
| Keywords:                       | NEONATOLOGY, Protocols & guidelines < HEALTH SERVICES ADMINISTRATION & MANAGEMENT, Neonatal intensive & critical care < INTENSIVE & CRITICAL CARE, PERINATOLOGY, QUALITATIVE RESEARCH                                                                                                                                                                                                                                                                                                                                                                                                                                                                                                                                                                                                                                                                                                                                                                                                                                                                                                                                                                                                                                                                                                                                                                                                                                                                                                                                                                                                                                                                                                                                  |
|                                 |                                                                                                                                                                                                                                                                                                                                                                                                                                                                                                                                                                                                                                                                                                                                                                                                                                                                                                                                                                                                                                                                                                                                                                                                                                                                                                                                                                                                                                                                                                                                                                                                                                                                                                                        |

1  
2  
3  
4  
5  
6  
7  
8  
9  
10  
11  
12  
13  
14  
15  
16  
17  
18  
19  
20  
21  
22  
23  
24  
25  
26  
27  
28  
29  
30  
31  
32  
33  
34  
35  
36  
37  
38  
39  
40  
41  
42  
43  
44  
45  
46  
47  
48  
49  
50  
51  
52  
53  
54  
55  
56  
57  
58  
59  
60





## TITLE PAGE

### Title:

The Chinese Neonatal Network: a national protocol for collaborative research and quality improvement in neonatal care

### Running title:

Protocol for CHNN collaborative research in China

### Authors and affiliations:

Mingyan Hei<sup>1</sup>, MD, PhD; Xiaoying Li<sup>2</sup>, MD, PhD; Yuan Shi<sup>3</sup>, MD, PhD; Yun Cao<sup>4</sup>, MD, PhD; Jianhua Sun<sup>5</sup>, MD; Hui Wu<sup>6</sup>, MD; Siyuan Jiang<sup>4</sup>, MD, PhD; Xiaolu Ma<sup>7</sup>, MD; Yanchen Wang<sup>4</sup>, MSC ; Huiqing Sun<sup>8</sup>, MD, PhD; Huayan Zhang<sup>9,10</sup>, MD; Lizhong Du<sup>7</sup>, MD, PhD; Wenhao Zhou<sup>4</sup>, MD, PhD; Shoo K Lee<sup>11,12</sup>, FRCPC; Chao Chen<sup>4</sup>, MD, PhD; on behalf of the Chinese Neonatal Network (CHNN)\*

(\* A full list of the CHNN Investigators is provided in the Group Information)

<sup>1</sup>Neonatal Center, Beijing Children's Hospital, Capital Medical University, Beijing China

<sup>2</sup>Department of Neonatology, Qilu Children's Hospital of Shandong University, Jinan, Shandong, China

<sup>3</sup>Department of Neonatology, Children's Hospital of Chongqing Medical University, Chongqing, China

1  
2  
3 <sup>4</sup>Department of Neonatology, Children's Hospital of Fudan University, Shanghai,  
4  
5 China

6  
7  
8 <sup>5</sup> Department of Neonatology, Shanghai Children's Medical Center, Shanghai Jiao  
9  
10 Tong University School of Medicine, Shanghai, China

11  
12 <sup>6</sup>Department of Neonatology, The First Bethune Hospital of Jilin University,  
13  
14 Changchun, Jilin, China

15  
16  
17 <sup>7</sup>Division of Neonatology, The Children's Hospital Zhejiang University School of  
18  
19 Medicine, Zhejiang, China

20  
21  
22 <sup>8</sup>Division of Neonatology, Children's Hospital Affiliated to Zhengzhou University,  
23  
24 Children's Hospital of Henan Zhengzhou, Hennan, China

25  
26  
27 <sup>9</sup>Division of Neonatology and Center for Newborn Care, Guangzhou Women and  
28  
29 Children's Medical Center, Guangdong, China

30  
31 <sup>10</sup> Department of Pediatrics, Children's Hospital of Philadelphia and University of  
32  
33 Pennsylvania Perelman School of Medicine, Pennsylvania, USA

34  
35  
36 <sup>10</sup>Maternal-Infant Care Research Centre and Department of Pediatrics Mount Sinai  
37  
38 Hospital, Toronto, ON, Canada

39  
40 <sup>11</sup>Department of Pediatrics, University of Toronto, Toronto, ON, Canada

41  
42  
43 <sup>12</sup>Department of Obstetrics and Gynecology and Dalla Lana School of Public  
44  
45 Health, University of Toronto, Toronto, ON, Canada

## 46 47 48 49 **Corresponding Author**

50  
51  
52 Professor Chao Chen, MD, PhD

1  
2  
3 Department of Neonatology, Children's Hospital of Fudan University, 399

4  
5 Wanyuan Road, Minhang District, Shanghai, China, 201102

6  
7  
8 Email: [chaochen6010@163.com](mailto:chaochen6010@163.com)  
9

## 10 11 12 **Authors' contacts**

13  
14  
15 Mingyan Hei [heimingyan@bch.com.cn](mailto:heimingyan@bch.com.cn)  
16  
17 Xiaoying Li [lxy\\_jn@sina.com](mailto:lxy_jn@sina.com)  
18  
19 Yuan Shi [shiyuan@hospital.cqmu.edu.cn](mailto:shiyuan@hospital.cqmu.edu.cn)  
20  
21 Yun Cao [yuncao@fudan.edu.cn](mailto:yuncao@fudan.edu.cn)  
22  
23 Jianhua Sun [sunjianhua@scmc.com.cn](mailto:sunjianhua@scmc.com.cn)  
24  
25 Hui Wu [wuhui@jlu.edu.cn](mailto:wuhui@jlu.edu.cn)  
26  
27 Siyuan Jiang [jane1350@163.com](mailto:jane1350@163.com)  
28  
29 Xiaolu Ma [maxiaolu\\_zjuch@zju.edu.cn](mailto:maxiaolu_zjuch@zju.edu.cn)  
30  
31 Yanchen Wang [ywang77@tulane.edu](mailto:ywang77@tulane.edu)  
32  
33 Huiqing Sun [s\\_huiqing@sina.com](mailto:s_huiqing@sina.com)  
34  
35 Huayan Zhang [zhangh@chop.edu](mailto:zhangh@chop.edu)  
36  
37 Lizhong Du [dulizhong@zju.edu.cn](mailto:dulizhong@zju.edu.cn)  
38  
39 Wenhao Zhou [zhouwenhao@fudan.edu.cn](mailto:zhouwenhao@fudan.edu.cn)  
40  
41 Shoo K Lee [shoo.lee@sinaihealth.ca](mailto:shoo.lee@sinaihealth.ca)  
42  
43  
44  
45  
46  
47  
48  
49

## 50 **Ethics information**

51  
52  
53  
54  
55  
56  
57  
58  
59  
60

This proposal was approved by the Ethics Committee of the Children's Hospital of Fudan University (#CHFUFU 2018-296) which was recognized by all participating hospitals. Waiver of consent were granted at all sites.

## Abbreviations

|      |                                                           |
|------|-----------------------------------------------------------|
| BPD  | Bronchopulmonary dysplasia                                |
| CNN  | Canadian Neonatal Network                                 |
| CHNN | Chinese Neonatal Network                                  |
| EPIQ | Evidence-based Practice for Quality Improvement           |
| INeo | International Network for Evaluating Outcomes of Neonates |
| IVH  | Intraventricular hemorrhage                               |
| NEC  | Necrotizing enterocolitis                                 |
| NI   | Nosocomial infection                                      |
| NICU | Neonatal intensive care unit                              |
| ROP  | Retinopathy of prematurity                                |
| VLBW | Very low birth weight                                     |
| VPT  | Very preterm                                              |

## Competing Interests

We have read and understood BMJ policy on declaration of interests and declare that we have no competing interests.

## Funding Statement

1  
2  
3 This work was jointly supported by Children's Hospital of Fudan University, China  
4 and the Maternal-Infant Care Research Centre at Mount Sinai Hospital, Toronto, Canada,  
5 which is supported by the Canadian Institutes of Health Research (CTP 87518) and the  
6 Ontario Ministry of Health and Long-Term Care. The funding agencies played no role in  
7 the study design; the collection, analysis, and interpretation of data; the writing of the  
8 manuscript; or the decision to submit the manuscript for publication.  
9  
10  
11  
12  
13  
14  
15  
16  
17  
18

19 **Keywords:**

20  
21  
22 Infants, Preterm; Neonatal intensive care unit; Outcomes; Neonatal network;  
23  
24 China; Neonates; Quality improvement  
25  
26  
27  
28  
29

30 **Abstract (214 words)**

31 **Introduction:** The objective of the Chinese Neonatal Network (CHNN) is to provide  
32 a platform for collaborative research, outcomes evaluation, and quality improvement for  
33 preterm infants with gestational age less than 32 weeks in China. The CHNN is the first  
34 national neonatal network and has the largest geographically representative cohort from  
35 neonatal intensive care units (NICUs) in China.  
36  
37  
38  
39  
40  
41  
42

43 **Methods and analysis:** Individual-level data from participating NICUs will be  
44 collected using a unique database developed by the CHNN on an on-going basis from  
45 January 2019. Data will be prospectively collected from all infants <32 weeks gestation or  
46 <1500 grams birth weight at 58 participating NICUs. Infant outcomes and inter-  
47 institutional variations in outcomes will be examined and used to inform quality  
48 improvement measures aimed at improving outcomes. Information about NICU  
49  
50  
51  
52  
53  
54  
55  
56  
57  
58  
59  
60

1  
2  
3 environmental and human resource factors and processes of neonatal care will also be  
4 collected and analyzed for association with outcomes. Clinical studies, including  
5  
6 randomized controlled trials will be conducted using the CHNN data platform.  
7  
8

9  
10 **Ethics and dissemination:** This study was approved by the ethics review board of  
11 Children's Hospital of Fudan University, which was recognized by all participating  
12 hospitals. Waiver of consent were granted at all sites. Only non-identifiable patient level  
13 data will be transmitted and only aggregate data will be reported in CHNN reports and  
14 publications.  
15  
16  
17  
18  
19  
20  
21  
22  
23

### 24 **Strengths and limitations of this study**

- 25  
26 1. This is the largest prospective, geographically representative, hospital-based cohort  
27 study of very preterm infants in China.  
28
- 29  
30 2. Data definitions and data collection protocols were standardized.  
31
- 32  
33 3. Data were collected on both outcomes and clinical practices to facilitate risk analysis  
34 and quality improvement.  
35  
36
- 37  
38 4. Limitations include lack of generalizability since participating hospitals were all  
39 tertiary hospitals.  
40  
41
- 42  
43 5. Outcomes data were not available for infants who were discharged against medical  
44 advice, which may bias the results  
45  
46  
47  
48  
49  
50  
51  
52  
53  
54  
55  
56  
57  
58  
59  
60

## 1. Introduction

Preterm infants are of significant public health concern worldwide due to their high risk of mortality and morbidities<sup>[1][2][3]</sup>. The incidence of preterm births is 7.3% in China and increasing steadily, with approximately 0.2 million infants born at less than 32 weeks gestational age (GA) born each year<sup>[4,5]</sup>. In October 2015, China announced a national plan to end the one-child policy that had been implemented for more than 40 years, allowing some couples to have two children. A national descriptive before-and-after comparative study showed that the announcement of China's universal two-child policy was associated with a rise in births in China, and with women giving birth being more likely to be multiparous and to be aged 35 and over<sup>[6]</sup>, with an increased likelihood of preterm births.

The population of China represents almost one fifth of the global population. In China, preterm infant survival in NICUs has significantly improved in recent years<sup>[7][8]</sup>. Neonatologists in China have made progress in NICU care, and introduced advances such as breast milk feeding<sup>[9]</sup>, NICU infection control<sup>[10]</sup>, family-integrated care of preterm infants<sup>[11]</sup>, and better treatment of bronchopulmonary dysplasia in very low birth weight infants<sup>[12]</sup>. However, previous studies mostly involved small groups of NICUs during a defined research period, and were subject to selection bias. This has led to problems of generalization in the context of the huge Chinese population with regional differences in population characteristics, medical expertise, economic development, and health insurance coverage. It also presents difficulties for translation of clinical evidence into expert consensus practice guidelines<sup>[13][14]</sup>, even though there is strong demand for them in China.

Previous authors have demonstrated that establishing a national neonatal network and database is an important step towards understanding the status of neonatal care and

1  
2  
3 outcomes in a country and can provide an effective platform for collaborative care, quality  
4 improvement (QI), research and knowledge translation<sup>[15-19]</sup>. Our goal is to establish a  
5 national Chinese Neonatal Network (CHNN) in the People's Republic of China, with a  
6 standardized database for collaborative care, quality improvement and research. This  
7 manuscript outlines the research protocol for CHNN.  
8  
9  
10  
11  
12  
13

## 14 15 16 17 **2. Objectives** 18

19 The specific objectives of CHNN are to: (1) Establish an on-going prospectively  
20 collected standardized database of very preterm infants (VPI) with GA <32 weeks or <1500  
21 grams birth weight among NICUs in China, as a platform for surveillance, quality  
22 improvement and research, (2) Assess and monitor major outcomes of VPI and their risk  
23 determinants, as well as inter-institutional variations in care practices and outcomes to  
24 identify clinical practices associated with good or poor outcomes, (3) Implement the  
25 Evidence-based Practice for Improving Quality (EPIQ) program to improve quality of care  
26 and outcomes, (4) Conduct collaborative research, including epidemiologic, clinical and  
27 health services studies and randomized controlled trials.  
28  
29  
30  
31  
32  
33  
34  
35  
36  
37  
38  
39  
40  
41  
42

## 43 **3. Methods and analysis** 44

### 45 **3.1 Participating hospitals** 46

47 CHNN was founded in 2018 with 58 participating hospitals from 25 provinces  
48 throughout mainland China (Figure 1). No hospitals in Tibet, Taiwan, and Hong Kong were  
49 included. CHNN hospitals are tertiary referral hospitals with Grade A level III NICUs  
50 authorized by the Health Administration of China and have recognized expertise in caring  
51  
52  
53  
54  
55  
56  
57  
58  
59  
60



1  
2  
3 for high-risk neonates. They were selected to be representative of different regions of the  
4 country but do not include all hospitals providing NICU care to VPI, and together they care  
5 for approximately 5% of all VPI in China. They include all government-designated  
6 neonatal centers of excellence in China, including four national children's medical centers,  
7 five regional children's medical centers and 30 provincial perinatal or children's medical  
8 centers. The other hospitals comprise major referral centers in large cities across China.  
9  
10 Forty-three hospitals were perinatal centers with birthing facilities, and 14 hospitals were  
11 freestanding children's hospitals that admitted only outborn infants. The median number of NICU  
12 beds was 40 (interquartile range [IQR], 30-62), and the median number of intermediate-level and  
13 continuing care neonatal beds was 66 (IQR, 40-91). For perinatal centers, the median number of  
14 annual deliveries was 10 280 (IQR, 6273-15 423). The median number of full-time equivalent  
15 neonatologists was 19 (IQR, 12-27), and the median number of NICU nurses was 42 (IQR, 30-  
16 65)<sup>[20]</sup>.

### 3.2 Study population

37 This is a prospective, hospital-based cohort. Data will be collected on all infants  
38 <32+0 weeks GA or birth weight <1500g admitted to participating NICUs. Stillborn,  
39 delivery room death, and infants transferred to non-participating hospitals within 24 hours  
40 after birth will be excluded. Readmissions and transfers between participating hospitals  
41 will be tracked as data from the same infants. Infants will be followed until NICU  
42 discharge/transfer or death.

### 3.3 Patient and public involvement

1  
2  
3 The study responds to patient concerns about quality of care and perceived variation  
4 in quality of care among different hospitals. Outcomes of quality improvement initiatives  
5 will be published and made available to patients.  
6  
7  
8  
9

### 10 11 12 **3.4 Achieving the 4 specific objectives of CHNN**

13  
14 Objective 1. Establish an on-going prospectively collected standardized database

#### 15 16 *Governance*

17  
18 The executive committee of CHNN comprises 13 senior neonatology leaders  
19 representing different regions of the country and include 2 co-chairpersons, 2 vice-  
20 presidents, and 3 secretary generals. The committee is responsible for setting policies and  
21 research agendas, and oversees the activities and operations of the network and  
22 coordinating center.  
23  
24  
25  
26  
27  
28  
29

#### 30 31 *Coordinating Center and Data Collection*

32  
33 The CHNN Coordinating and Data Centre is located at the Children's Hospital of  
34 Fudan University, Shanghai, China. The Data Center is equipped with dedicated servers  
35 that are managed by the Information Technology Department of the Children's Hospital of  
36 Fudan University in compliance with hospital, municipal and national standards for data  
37 security. A unique scalable customized database with built-in error checking based on MS  
38 Access was created in-house. A standard manual of operations and definitions was  
39 provided to all participating centers. Dedicated data abstractors under the supervision of  
40 the site principal investigator are responsible for data acquisition in each hospital and  
41 centralized training sessions were organized to teach data abstractors to carry out data  
42 collection and uploading to the CHNN database. Data abstractors enter data directly from  
43  
44  
45  
46  
47  
48  
49  
50  
51  
52  
53  
54  
55  
56  
57  
58  
59  
60

1  
2  
3 patients charts into a dedicated computer at each hospital and electronically transmitted  
4 data to the CHNN Coordinating Center. Only non-identifiable patient information will be  
5 transferred and only aggregate data results will be reported and published. Data quality is  
6 ensured at multiple levels. The data entry program has built-in error checking. Additional  
7 data checks are performed quarterly by the coordinating center for quality and  
8 completeness, and site-specific data quality reports will be fed back to each site and data  
9 records returned for corrections if needed. Data quality audit using data re-abstraction of  
10 randomly selected patient charts will be performed annually. Site investigators will be  
11 responsible for data quality control in each site. An annual report will be produced for the  
12 network.  
13  
14  
15  
16  
17  
18  
19  
20  
21  
22  
23  
24  
25

### 26 *Data Variables*

27  
28 Data variables were selected by the CHNN executive committee (Table 1).  
29 Definitions of variables were standardized and mapped to the ICD-10<sup>[21]</sup> and SNOMED<sup>[22]</sup>  
30 dictionaries as appropriate. Mortality is defined as death due to any cause prior to discharge  
31 home. BPD is defined as oxygen requirement at 36 weeks post-menstrual age<sup>[23]</sup>. SNI is  
32 defined as  $\geq$  stage 3 intraventricular hemorrhage (IVH) with ventricular dilatation or  
33 parenchymal injury (including periventricular leukomalacia) with or without IVH,  
34 according to the Papile classification<sup>[24]</sup>. ROP is defined as  $\geq$  stage 3 according to the  
35 International Classification<sup>[25]</sup> or need for laser surgery or intraocular injections of anti-  
36 vascular endothelial growth factor agents. NEC is defined as  $\geq$  stage 2 according to Bell's  
37 criteria<sup>[26]</sup>. NI is defined as culture-proven sepsis (blood or cerebrospinal fluid positive for  
38 pathogenic organism) at  $>3$  days or 72 hours postnatal age<sup>[27]</sup>. Hemodynamically  
39  
40  
41  
42  
43  
44  
45  
46  
47  
48  
49  
50  
51  
52  
53  
54  
55  
56  
57  
58  
59  
60

significant PDA is defined as PDA requiring pharmacological treatment or surgical ligation<sup>[28]</sup>.

Table 1: CHNN data variables

| Categories                | Variables                                                                                                                                                                                                                                                                                                                                         |
|---------------------------|---------------------------------------------------------------------------------------------------------------------------------------------------------------------------------------------------------------------------------------------------------------------------------------------------------------------------------------------------|
| Demographic               | Birth weight Gestation, Sex, Ethnicity, SGA (Small for gestational age)                                                                                                                                                                                                                                                                           |
| Obstetric/perinatal Risks | Maternal age Education, Smoking, Drugs in pregnancy, Antenatal care, Antenatal complications, Hypertension Preterm labor, Preterm rupture of membranes, Maternal diabetes, Group B Strep Chorioamnionitis, Multiple gestation, Antenatal steroids, Delivery mode Presentation, Drug treatment, Delivery complications, Apgar score, Resuscitation |
| NICU Care                 | Admission illness severity (SNAP, TRIPS), Fluids, Nutrition, Assisted respiration, Antibiotics, Drug therapy, Intravenous lines, Catheters Procedures, Surgery                                                                                                                                                                                    |
| Outcomes                  | (a) Primary - Survival without major morbidity (BPD, SNI, ROP, NEC, NI)<br>(b) Secondary outcomes – Death , BPD, SNI, ROP, NEC, NI, Patent ductus arteriosus (PDA), Air leak syndrome                                                                                                                                                             |

1  
2  
3 Resource Use Duration of hospitalization, Duration of ventilation,  
4  
5 Duration of oxygen therapy, Use of central catheters,  
6  
7 Parenteral nutrition, Surgery  
8  
9

10  
11 Abbreviations: SNAP – Score for neonatal acute physiology, TRIPS – Transport risk index  
12 of physiologic stability, BPD – bronchopulmonary dysplasia, SNI – severe neurological  
13 injury, ROP – retinopathy of prematurity, NEC – necrotizing enterocolitis, NI – nosocomial  
14 infection  
15  
16  
17  
18

19  
20  
21 Objective 2. Assess and monitor major outcomes of VPI and their risk determinants, and  
22 inter-institutional variations in care and outcomes  
23  
24

25  
26 Infant characteristics and outcomes will be summarized as counts and percentages for  
27 categorical variables and using the means and standard deviations or the medians and  
28 interquartile ranges for continuous variables. Sub-group analysis and inter-institutional  
29 comparisons will use the Chi-square test for categorical variables and ANOVA F-test or  
30 Mood's median test for continuous variables. Multivariable logistic regression models with  
31 adjustment for confounders will be used to assess risk factors associated with outcomes.  
32  
33  
34  
35  
36  
37  
38  
39

40 To study inter-institutional variations in primary and secondary outcomes, the ratios  
41 and associated 95% confidence intervals (CI) will be calculated, and 'caterpillar plots' will  
42 be used to graphically display differences between participating sites. The 'indirect  
43 standardization' approach will be used to compute the standardized outcome ratios in order  
44 to adjust for multiple baseline characteristics. Each NICU can compare its own observed  
45 rate with the average CHNN rate to identify the relative level of its own unit. For each  
46 outcome, the expected number of events will be computed as the sum of predicted  
47  
48  
49  
50  
51  
52  
53  
54  
55  
56  
57  
58  
59  
60

1  
2  
3 probabilities from a multivariable model (logistic regression or zero inflated negative  
4 binomial models based on data distribution) derived using data from all NICUs with  
5 adjustment for confounders. NICU standardized outcome ratios will be graphically  
6 displayed using ‘funnel’ plots with 95% prediction intervals for comparison between  
7 NICUs. Pair-wise comparisons between NICUs will be performed using multivariate  
8 regression models adjusted for confounders. The generalized estimating equation (GEE)  
9 models will be used for adjusting analyses for infant cluster within the CHNN. Hierarchical  
10 random-effects regression models will be used to allow for variation at unit level. In  
11 addition, statistical significance will be evaluated by applying a Bonferroni correction to  
12 account for multiple pair-wise comparisons.  
13  
14  
15  
16  
17  
18  
19  
20  
21  
22  
23  
24  
25

26 Associations of clinical practices and other factors with outcomes will be assessed  
27 under the general framework of individual patient-level data meta-analyses. Random-  
28 effects models with adjustment for confounding variables and important risk factors will  
29 be used to assess the association and residual variation due to unknown or unmeasured  
30 unit-specific factors. These analyses will identify treatment practices and health care  
31 services with significant effects on outcomes, which subsequently can be targeted for  
32 implementation or improvement. Analyses (two-sided tests) based on 10,000 yearly  
33 admissions evaluating the effects of treatments or practices (assuming 50% exposure) on  
34 outcomes (incidence 1% to 40%) will be able to detect relative risks of 1.6 to 1.1 with a  
35 statistical power of 80% and type I error rate of 5%. This power calculation is based on the  
36 anticipated data collection by CHNN during the first year. Safety and outcome  
37 improvements will be monitored within each unit using control charts and Chi-square tests  
38 for differences from baseline in outcome rates. Multivariable logistic regression analyses  
39  
40  
41  
42  
43  
44  
45  
46  
47  
48  
49  
50  
51  
52  
53  
54  
55  
56  
57  
58  
59  
60

1  
2  
3 will pool data from units within CHNN network to assess changes in outcomes over time  
4  
5 with adjustment for potential confounders and important risk factors and accounting for  
6  
7 clustering.  
8  
9

10  
11  
12 Objective 3. Implement Evidence-based Practice for Improving Quality (EPIQ) program  
13  
14 to improve quality of care and outcomes  
15

16  
17 EPIQ is a multi-faceted system for quality improvement that facilitates  
18  
19 implementation of practice change<sup>[29]</sup>. EPIQ is based on 3 features: (a) systematic review  
20  
21 of evidence in the published literature, (b) quantitative and qualitative analysis of outcomes  
22  
23 and practices to identify practices associated with good or poor outcomes for targeted  
24  
25 change, and (c) use of a collaborative network of clinicians, researchers and administrators  
26  
27 to facilitate mutual learning and implement change. In Shanghai, Cao et al.<sup>[30]</sup> demonstrated  
28  
29 in the multi-center EPIQ-REIN study, that over a 1-year period, EPIQ reduced the rate of  
30  
31 ventilator associated pneumonia from 48.84 per 1,000 ventilator-days to 18.50 per 1,000  
32  
33 ventilator-days ( $P<0.001$ ), and rates of central line associated blood stream infection  
34  
35 (CLABSI) from 16.7 per 1,000 central line days to 5.2 per 1,000 central line days ( $P<0.01$ ).  
36  
37

38  
39  
40 After the first year of data collection (baseline data), we will implement EPIQ in all  
41  
42 CHNN NICUs and compare the results pre and post EPIQ implementation. The EPIQ  
43  
44 program has well established published protocols for training of personnel, coordination,  
45  
46 literature review, risk analysis, identification of target outcomes, implementation and  
47  
48 facilitation of practice changes, monitoring and surveillance, communication and safety  
49  
50 assurance; and CHNN has well trained personnel, teams and organization from the  
51  
52 previous EPIQ-REIN experience<sup>[30]</sup>. A national CHNN infrastructure for collaborative  
53  
54  
55  
56  
57  
58  
59  
60

1  
2  
3 quality improvement will be established. Hospitals will be organized into groups that target  
4 specific outcomes. Multi-disciplinary groups will examine the literature, conduct  
5 systematic reviews and examine hospital specific data in China to develop practice  
6 guidelines and bundles of best practices for implementation in CHNN NICUs. Quarterly  
7 cycles of practice change will be introduced using PDSA (Plan-Do-Study-Act) cycles of  
8 rapid change, and outcomes will be monitored quarterly and results fed back to hospitals.  
9  
10 An online Teaching & Communication web portal will be used to facilitate collaboration  
11 between sites, including site visits, discussions and planning.. Safety will be monitored.  
12  
13 Multivariable logistic regression analyses will pool data from units to assess changes in  
14 outcomes over time with adjustment for potential confounders and important practice  
15 related risk factors, which will be targeted for practice change.  
16  
17  
18  
19  
20  
21  
22  
23  
24  
25  
26  
27  
28  
29  
30

31 Objective 4. Conduct collaborative research, including epidemiologic, clinical and health  
32 services studies and randomized controlled trials.  
33  
34

35 The CHNN database platform will support additional research initiatives, including  
36 epidemiologic, clinical and health services and randomized controlled trials. Research  
37 projects can be initiated by any CHNN member, approved by the CHNN Scientific  
38 Advisory Committee, and coordinated through the CHNN Coordinating Centre, where data  
39 will also be collected and analyzed. In future stages, limited datasets may be released to  
40 investigators using a secure electronic portal system.  
41  
42  
43  
44  
45  
46  
47  
48  
49  
50

### 51 **3.5 Statistical analysis**

52  
53  
54  
55  
56  
57  
58  
59  
60



1  
2  
3 All analyses of cohort data will be performed by a team of statisticians (including  
4 PhD and MSc statisticians) at the CHNN coordinating center, under the leadership of the  
5 CHNN Secretary General supervising the center. For specific research projects, relevant  
6 data may be released to the responsible research group for their analysis. Participating sites  
7 may perform analysis of their own individual site data.  
8  
9  
10  
11  
12  
13  
14  
15  
16

#### 17 **4. Ethics and dissemination**

18  
19 Central ethics approval was obtained from the Ethics Committee of the Children's  
20 Hospital of Fudan University (#CHFUFU 2018-296) and recognized by all participating sites.  
21 All participating sites have signed data transfer agreements with the CHNN Coordinating  
22 Centre and obtained ethics approval from their affiliated institutions or hospitals to allow  
23 sending de-identified data to the CHNN Coordinating Centre in compliance with national,  
24 provincial and local hospital regulations for ensuring patient privacy and confidentiality,  
25 and are consistent with international standards. All CHNN studies will not take individual  
26 patients, and waiver of consent were granted at all sites. The results of this registry will be  
27 disseminated by 3 methods: (1) An annual report will be published and provided to  
28 participating hospitals and regional health authorities. (2) Results will be reported at  
29 national and international scientific meetings. (3) Results will be published in domestic and  
30 international scientific journals.  
31  
32  
33  
34  
35  
36  
37  
38  
39  
40  
41  
42  
43  
44  
45  
46  
47  
48  
49

#### 50 **5. Discussion**

51  
52 The CHNN collaboration will be the first national network to examine data from a  
53 large cohort of preterm infants that is representative of the different regions of China on an  
54  
55  
56  
57  
58  
59  
60

1  
2  
3 on-going basis. This is important because China has a huge population, with many regional  
4 differences in social, economic and health care development. Unfortunately, the existing  
5 literature regarding preterm infants in China has been mostly limited to single-centre  
6 studies or multicentre studies with small numbers of participating sites<sup>[8,10,30,31]</sup>. Findings  
7 from this national collaboration will provide a comprehensive picture of outcomes of very  
8 preterm infants in Chinese NICUs and establish a strong system for outcomes surveillance  
9 and monitoring trends in clinical practices and outcome variations. Data from CHNN will  
10 also provide robust estimates for development of clinical practice guidelines and health  
11 care recommendations that can be generalizable across the country.  
12  
13  
14  
15  
16  
17  
18  
19  
20  
21  
22  
23

24 Quality improvement is a key goal, especially for China where neonatal care is still  
25 developing and there is significant room for improvement. The adoption of EPIQ will  
26 provide a robust system for quality improvement in Chinese NICUs. EPIQ was pioneered  
27 by the Canadian Neonatal Network, where Lee et al<sup>[29]</sup> first demonstrated 44% reduction  
28 in nosocomial infection and 15% reduction in bronchopulmonary dysplasia in a multi-  
29 center randomized controlled trial, and EPIQ is now practiced in all Canadian NICUs. In a  
30 comparative study of outcomes by the International Network for Evaluation of Outcomes  
31 (iNEO), the implementation of EPIQ nationally was credited with rapidly improving  
32 neonatal outcomes in Canada in comparison with other countries<sup>[32,33]</sup>. Subsequent studies  
33 in Canada and China provided confirmation of its efficacy<sup>[34-36]</sup>. Since Chinese NICUs  
34 have experience using EPIQ, this will facilitate its implementation in Chinese NICUs and  
35 provide a proven method for improving quality of care and outcomes in China. However,  
36 we recognize that change can be difficult to implement, especially those that require  
37 making financial investments, adding staff, or breaking cultural traditions.  
38  
39  
40  
41  
42  
43  
44  
45  
46  
47  
48  
49  
50  
51  
52  
53  
54  
55  
56  
57  
58  
59  
60

1  
2  
3 Notwithstanding possible early reluctance to follow these recommendations, the strength  
4 of evidence produced from the data, the pragmatic nature of the results, and the examples  
5 provided by “early adopter” NICUs will be the most persuasive elements of the CHNN  
6 collaboration.  
7  
8  
9  
10

11  
12 The flexibility of the CHNN data platform to accommodate additional studies like  
13 randomized controlled trials provides a unique opportunity for Chinese NICUs. China has  
14 a large population, which is conducive to conducting multi-center studies rapidly and  
15 efficiently. Once the CHNN data platform is fully functional, we anticipate that China will  
16 play a leading role in conducting large scale multi-center studies and clinical trials.  
17  
18  
19  
20  
21  
22

23  
24 Limitations of CHNN are: (1) The data are from a select group of large tertiary NICUs  
25 with the highest level of neonatal care in China, and may not be generalizable to the whole  
26 population, (2) There may be biases inherent in large cohort databases of this nature,  
27 including reporting bias, selection bias and others, (3) Data on parent participation, pain  
28 management, skin-to-skin contact care and other important developmental aspects of  
29 modern neonatal care are not currently available but will be included in the future, (4) Data  
30 on resource use is limited.  
31  
32  
33  
34  
35  
36  
37  
38  
39  
40  
41

42 In summary, the CHNN collaboration will serve as a strong national platform for  
43 collaborative research, outcomes evaluation, and quality improvement for VPI in China.  
44 The knowledge generated will have potential to benefit infants and families in China and  
45 internationally.  
46  
47  
48  
49  
50

51  
52  
53  
54 **Author Contributions:**  
55  
56  
57

1  
2  
3 Study concept and design: Shoo K Lee, Chen Chao, Mingyan Hei  
4  
5

6 Drafting of the manuscript: Mingyan Hei, Shoo K Lee  
7  
8

9 Critical revision of the manuscript for important intellectual content: Mingyan Hei,  
10 Xiaoying Li, Yuan Shi, Yun Cao, Jianhua Sun, Hui Wu, Siyuan Jiang, Xiaolu Ma,  
11 Yanchen Wang, Huiqing Sun, Huayan Zhang, Lizhong Du, Wenhao Zhou, Shoo K Lee,  
12 Chao Chen  
13  
14  
15  
16  
17

18 Acquisition of data: Mingyan Hei, Xiaoying Li, Yuan Shi, Yun Cao, Jianhua Sun,  
19 Hui Wu, Siyuan Jiang, Xiaolu Ma, Huiqing Sun  
20  
21  
22

23 Statistical analysis: Yanchen Wang  
24  
25

26 Interpretation of data: Mingyan Hei, Xiaoying Li, Yuan Shi, Yun Cao, Jianhua Sun,  
27 Hui Wu, Siyuan Jiang, Xiaolu Ma, Huiqing Sun, Huayan Zhang, Lizhong Du, Wenhao  
28 Zhou, Shoo K Lee, Chao Chen  
29  
30  
31  
32  
33

34 Study supervision: Mingyan Hei, Chao Chen, Shoo K Lee, Wenhao Zhou, Lizhong  
35 Du  
36  
37  
38  
39  
40  
41  
42

43 **Group Information: Chairmen:** Shoo K. Lee, MBBS, Mount Sinai Hospital, University  
44 of Toronto; Chao Chen, MD, Children's Hospital of Fudan University. **Vice-Chairmen:**  
45 Lizhong Du, MD, Children's Hospital of Zhejiang University School of Medicine; Wenhao  
46 Zhou, Children's Hospital of Fudan University. **Site investigators of the Chinese**  
47 **Neonatal Network:** Children's Hospital of Fudan University: Yun Cao, MD; The Third  
48 Affiliated Hospital of Zhengzhou University: Falin Xu, MD; Tianjin Obstetrics &  
49  
50  
51  
52  
53  
54  
55  
56  
57  
58  
59  
60

1  
2  
3 Gynecology Hospital: Xiuying Tian, MD; Guangzhou Women and Children's Medical  
4 Center: Huayan Zhang, MD; Children's Hospital of Shanxi: Yong Ji, MD; Northwest  
5 Women's and Children's Hospital: Zhankui Li, MD; Gansu Provincial Maternity and Child  
6 Care Hospital: Bin Yi, MD; Shengjing Hospital of China Medical University: Xindong  
7 Xue, MD; Shenzhen Maternity and Child Health Care Hospital: Chuanzhong Yang, MD;  
8 Quanzhou Women and Children's Hospital: Dongmei Chen, MD; Suzhou Municipal  
9 Hospital affiliated to Nanjing Medical University: Sannan Wang, MD; Guizhou Women  
10 and Children's Hospital/Guiyang Children's Hospital: Ling Liu, MD; Hunan Children's  
11 Hospital: Xirong Gao, MD; The First Bethune Hospital of Jilin University: Hui Wu, MD;  
12 Fujian Maternity and Child Health Hospital, Affiliated Hospital of Fujian Medical  
13 University: Changyi Yang, MD; Nanjing Maternity and Child Health Care Hospital:  
14 Shuping Han, MD; Qingdao Women and Children's Hospital: Ruobing Shan, MD; The  
15 Affiliated Hospital of Qingdao University: Hong Jiang, MD; Children's Hospital of  
16 Shanghai: Gang Qiu, MD; Women and Children's Hospital of Guangxi Zhuang  
17 Autonomous Region: Xinnian Pan, MD; Children's Hospital of Nanjing Medical  
18 University: Youyan Zhao, MD; Henan Children's Hospital: Wenqing Kang, MD; The First  
19 Affiliated Hospital of Xinjiang Medical University: Mingxia Li, MD; Foshan Women and  
20 Children's Hospital: Xuqiang Ye, MD; The First Affiliated Hospital of Anhui Medical  
21 University: Lili Wang, MD; Shanghai First Maternity and Infant Hospital: Jiangqin Liu  
22 MD; Yuying Children's Hospital Affiliated to Wenzhou Medical University: Zhenlang Lin,  
23 MD; Children's Hospital of Chongqing Medical University: Yuan Shi, MD; The First  
24 Affiliated Hospital of Zhengzhou University: Xiuyong Cheng, MD; The First Affiliated  
25 Hospital of USTC, Division of Life Sciences and Medicine, University of Science and  
26

1  
2  
3 Technology of China: Jiahua Pan, MD; Shaanxi Provincial People's Hospital: Qin Zhang,  
4 MD; Children's Hospital of Soochow University: Xing Feng, MD; Wuxi Maternity and  
5 Child Healthcare Hospital: Qin Zhou, MD; People's Hospital of Xinjiang Uygur  
6 Autonomous Region: Long Li, MD; The Second Xiangya Hospital of Central South  
7 University: Pingyang Chen, MD; Qilu Children's Hospital of Shandong University:  
8 Xiaoying Li, MD; Hainan Women and Children's Hospital: Ling Yang, MD; Xiamen  
9 Children's Hospital: Deyi Zhuang, MD; Xinhua Hospital affiliated to Shanghai Jiao Tong  
10 University School of Medicine: Yongjun Zhang, MD; Shanghai Children's Medical Center  
11 , Shanghai Jiao Tong University School of Medicine: Jianhua Sun, MD; Shenzhen  
12 Children's Hospital: Jinxing Feng, MD; Children's Hospital Affiliated to Capital Institute  
13 of Pediatrics: Li Li, MD; Women and Children's Hospital, School of Medicine, Xiamen  
14 university: Xinzhu Lin, MD; General Hospital of Ningxia Medical University: Yinping  
15 Qiu, MD; First Affiliated Hospital of Kunming Medical University: Kun Liang, MD; Hebei  
16 Provincial Children's Hospital: Li Ma, MD; Jiangxi Provincial Children's Hospital: Liping  
17 Chen, MD; Fuzhou Children's Hospital of Fujian Province: Liyan Zhang, MD; First  
18 Affiliated Hospital of Xian Jiao Tong University: Hongxia Song, MD; Dehong people's  
19 Hospital of Yunnan Province: Zhaoqing Yin, MD; Beijing Children's Hospital, Capital  
20 Medical University: Mingyan Hei, MD; Zhuhai Center for Maternal and Child Health Care:  
21 Huiwen Huang, MD; Guangdong Women and Children's Hospital: Jie Yang, MD; Dalian  
22 Municipal Women and Children's Medical Center: Dong Li, MD; Peking Union Medical  
23 College Hospital: Guofang Ding, MD; Obstetrics & Gynecology Hospital of Fudan  
24 University: Jimei Wang, MD; Shenzhen Hospital of Hongkong University: Qianshen

1  
2  
3 Zhang, MD; Children's Hospital of Zhejiang University School of Medicine: Xiaolu Ma,  
4  
5 MD. **Advisor:** Joseph Ting, MBBS; University of Alberta  
6  
7  
8  
9

## 10 **Acknowledgements**

11  
12  
13 We would like to deeply thank Prof. Jianxing Zhu, Prof. Dezhi Mu, and Prof. Xing  
14  
15 Feng for their dedicated support of the Chinese Neonatal Network. We would also like to  
16  
17 thank Heather McDonald Kinkaid, PhD, from the Maternal-Infant Care Research Centre  
18  
19 (MiCare) at Mount Sinai Hospital in Toronto, Canada, for editorial assistance; and Xiang  
20  
21 Y. Ye, MSc, from the MiCare, for ongoing statistical supervision. MiCare is supported by  
22  
23 the Canadian Institutes of Health Research and the Ontario Ministry of Health and Long-  
24  
25 Term Care. We also thank all staffs from participating hospitals of the CHNN.  
26  
27  
28  
29  
30  
31

## 32 **References**

- 33  
34  
35 1. da Cunha Durães MI, Flor-De-Lima F, Rocha G, Soares H, Guimarães H. Morbidity  
36  
37 and mortality of preterm infants less than 26 weeks of gestational age. *Minerva Pediatr.*  
38  
39 2019;71(1):12-20. doi:10.23736/S0026-4946.16.04609-0.  
40  
41  
42 2. Huff K, Rose RS, Engle WA. Late preterm infants: morbidities, mortality, and  
43  
44 management recommendations. *Pediatr Clin North Am.* 2019;66(2):387-402.  
45  
46 doi:10.1016/j.pcl.2018.12.008.  
47  
48  
49 3. Richter LL, Ting J, Muraca GM, Synnes A, Lim KI, Lisonkova S. Temporal trends in  
50  
51 neonatal mortality and morbidity following spontaneous and clinician-initiated preterm  
52  
53 birth in Washington State, USA: a population-based study. *BMJ Open.*  
54  
55 2019;9(1):e023004. doi:10.1136/bmjopen-2018-023004.  
56  
57  
58  
59  
60

- 1  
2  
3 4. National Bureau of Statistics Population. Population. China statistic yeat book 2019.  
4  
5 Accessed November 30, 2020. <http://www.stats.gov.cn/tjsj/ndsj/2019/indexch.htm>  
6  
7
- 8 5. Chen C, Zhang JW, Xia HW, et al. Preterm birth in china between 2015 and 2016. Am  
9  
10 J Public Health. 2019;109(11):1597-1604. doi:10.2105/AJPH.2019.305287  
11
- 12 6. Li HT, Xue M, Hellerstein S, Cai Y, Gao Y, Zhang Y, et al. Association of China's  
13  
14 universal two child policy with changes in births and birth related health factors:  
15  
16 national, descriptive comparative study. BMJ. 2019;366:l4680. doi:10.1136/bmj.l4680.  
17  
18
- 19 7. Jiang S, Yan W, Li S, et al. Mortality and morbidity in infants <34 weeks' gestation in  
20  
21 25 nicus in china: A prospective cohort study. *Front Pediatr* 2020;8:33  
22  
23 doi:[10.3389/fped.2020.00033](https://doi.org/10.3389/fped.2020.00033)  
24  
25
- 26 8. Li SJ, Yan SY, Zhou Y, Han KL, Guo WL, Xia Q, et al. Ventilator-associated  
27  
28 pneumonia among premature infants <34 weeks' gestational age in neonatal intensive  
29  
30 care unit in China: a multicenter study. *Chin J Pediatr*. 2017; 55(3):182-7  
31  
32 doi:[10.3760/cma.j.issn.0578-1310.2017.03.004](https://doi.org/10.3760/cma.j.issn.0578-1310.2017.03.004)  
33  
34
- 35 9. Huiqing Sun, Shuping Han, Rui Cheng, Mingyan Hei, Foteini Kakulas, Shoo K. Lee.  
36  
37 Testing the feasibility and safety of feeding preterm infatns fresh mother's own milk in  
38  
39 the NICU: A pilot study. *Scientific Reports* 2019,9:941-949 doi:[10.1038/s41598-018-](https://doi.org/10.1038/s41598-018-37111-7)  
40  
41  
42  
43  
44  
45  
46  
47  
48  
49  
50  
51  
52  
53  
54  
55  
56  
57  
58  
59  
60
10. Jiang S, Yang Z, Shan R, Zhang Y, Yan W, Yang Y, et al. Neonatal outcomes following  
culture-negative late-onset sepsis among preterm infants. *Pediatr Infect Dis J*.  
2020;39(3):232-238. doi:10.1097/inf.0000000000002558.
11. Hei M, Gao X, Gao X, et al. Is family integrated care in neonatal intensive care units  
feasible and good for preterm infants in China: study protocol for a cluster randomized



- controlled trial. *Trials*. 2016;17:22. doi:10.1186/s13063-015-1152-9
12. Jiangsu Multicenter Study Collaborative Group for Breastmilk Feeding in Neonatal Intensive Care Units. Clinical characteristics and risk factors of very low birth weight infants with bronchopulmonary dysplasia: multicenter retrospective analysis [in Chinese]. *Chin J Pediatr*, 2019,57(1):33-39 DOI:10.3760/cma.j.issn.0578-1310.2019.01.009
13. The Subspecialty Group of Neonatology, the Society of Pediatrics, Chinese Medical Association; the Editorial Board, Chinese Journal of Pediatrics. Expert consensus on clinical management of premature infants with Bronchopulmonary dysplasia [Chinese]. *Chin J Pediatr*, 2020,58(05):358-365. DOI: 10.3760/cma.j.cn112140-20200317-00254
14. Experts Working Group on Consensus on the Use of Human Milk Fortifier in Preterm Infants; Editorial Board Committee of Chinese Journal of Neonatology. Consensus on the use of human milk fortifier for preterm infants [in Chinese]. *Chin J Neonatol*, 2019,34(5):321-328. DOI: 10.3760/cma.j.issn.2096-2932.2019.05.001
15. Rochow N, Landau-Crangle E, Lee S, Schünemann H, Fusch C. Quality Indicators but Not Admission Volumes of Neonatal Intensive Care Units Are Effective in Reducing Mortality Rates of Preterm Infants. *PLoS One*. 2016;11(8):e0161030. doi:10.1371/journal.pone.0161030
16. Lee SK, McMillan DD, Ohlsson A, Pendray M, Synnes A, Whyte R, Chien LY, Sale J. Variations in practice and outcomes in the Canadian NICU network: 1996–1997. *Pediatrics* 2000;106(5):1070-1079 doi:10.1542/peds.106.5.1070
17. Fellman V, Hellstrom-Westas L, Norman M, Westgren M, Kallen K, Lagercrantz H, Marsal K, Serenius F, Wennergren M. One-year survival of extremely preterm infants

- 1  
2  
3 after active perinatal care in Sweden. JAMA 2009, 301:2225-2233  
4  
5 doi:10.1001/jama.2009.771  
6  
7
- 8 18. Bader D, Kugelman A, Boyko V, Levitzki O, Lerner-Geva L, Riskin A, Reichman B.  
9  
10 Risk factors and estimation tool for death among extremely premature infants: a  
11  
12 national study. Pediatrics 2010, 125(4):696-703 doi:10.1542/peds.2009-1607  
13  
14
- 15 19. Gale C, Santhakumaran S, Nagarajan S, Statnikov Y, Modi N. Impact of managed  
16  
17 clinical networks on NHS specialist neonatal services in England: population based  
18  
19 study. BMJ 2012, 344:e2105 doi:[10.1136/bmj.e2105](https://doi.org/10.1136/bmj.e2105)  
20  
21
- 22 20. Cao Y, Jiang S, Sun J, Hei M, Wang L, Zhang H, Ma X, Wu H, Li X, Sun H, Zhou W, Shi Y,  
23  
24 Wang Y, Gu X, Yang T, Lu Y, Du L, Chen C, Shoo K. Lee, Zhou W; for the Chinese Neonatal  
25  
26 Network. Assessment of Neonatal Intensive Care Unit Practices, Morbidity, and Mortality  
27  
28 Among Very Preterm Infants in China. JAMA Network Open. 2021;4(8):e2118904.  
29  
30 doi:10.1001/jamanetworkopen.2021.18904  
31  
32
- 33 21. World Health Organization: International Statistical Classification of Diseases and  
34  
35 Related Health Problems 10th Revision (ICD-10). 2010.  
36  
37 <http://apps.who.int/classifications/icd10/browse/2010/en> website  
38  
39
- 40 22. International Health Terminology Standards Development Organisation. SNOMED  
41  
42 CT. 2012. <http://www.ihtsdo.org/snomed-ct/>  
43  
44
- 45 23. Shennan AT, Dunn MS, Ohlsson A, et al. Abnormal pulmonary outcomes in premature  
46  
47 infants: prediction from oxygen requirement in the neonatal period. Pediatrics  
48  
49 1988;82(4):527-32.  
50
- 51 24. Papile LA, Burstein J, Burstein R, et al. Incidence and evolution of subependymal and  
52  
53 intraventricular hemorrhage: a study of infants with birth weights less than 1,500 gm.  
54  
55  
56  
57  
58  
59  
60

- 1  
2  
3 J Pediatr 1978;92(4):529-34. doi:[10.1016/s0022-3476\(78\)80282-0](https://doi.org/10.1016/s0022-3476(78)80282-0)  
4  
5  
6 25. The International Classification of Retinopathy of Prematurity revisited. Arch  
7  
8 Ophthalmol 2005;123(7):991-9. doi:10.1001/archopht.123.7.991  
9  
10 26. Bell MJ, Ternberg JL, Feigin RD, et al. Neonatal necrotizing enterocolitis. Therapeutic  
11  
12 decisions based upon clinical staging. Ann Surg 1978;187(1):1-7.  
13  
14 doi:10.1097/00000658-197801000-00001  
15  
16 27. Freeman J, Epstein MF, Smith NE, Platt R, Sidebottom DG, Goldmann DA. Extra  
17  
18 hospital stay and antibiotic usage with nosocomial coagulase-negative staphylococcal  
19  
20 bacteremia in two neonatal intensive care unit populations. Am J Dis Child 1990,  
21  
22 144(3):324-329. doi:[10.1001/archpedi.1990.02150270074029](https://doi.org/10.1001/archpedi.1990.02150270074029)  
23  
24  
25 28. Jasani B, Weisz DE, McNamara PJ. Evidence-based use of acetaminophen for  
26  
27 hemodynamically significant ductus arteriosus in preterm infants. Semin  
28  
29 Perinatol. 2018;42(4):243-252 doi:10.1053/j.semperi.2018.05.007  
30  
31  
32 29. Lee SK, Aziz K, Singhal N, Cronin CM, James A, Lee DS, Matthew D, Ohlsson A,  
33  
34 Sankaran K, Seshia M, Synnes A, Walker R, Whyte R, Langley J, Macnab YC, Stevens  
35  
36 B, von Dadelszen P. Improving the quality of care for infants: a cluster randomized  
37  
38 controlled trial. CMAJ 2009, 181(8):469-476 doi:[10.1503/cmaj.081727](https://doi.org/10.1503/cmaj.081727)  
39  
40  
41 30. Cao Y, Jiang SY, Zhou Q. Introducing evidence-based practice improvement in  
42  
43 Chinese neonatal intensive care units, Transl Pediatr. 2019 Jul; 8(3): 257–261. doi:  
44  
45 10.21037/tp.2019.07.07  
46  
47  
48 31. REIN-EPIQ Study Group. Outcomes of very low birth weight infants at discharge: a  
49  
50 multicentered cross-sectional study of 25 tertiary neonatal intensive care units in China  
51  
52 [Chinese]. *Chin J Peirnat Med.* 2018;21(6):294-400  
53  
54  
55  
56  
57  
58  
59  
60

- 1  
2  
3  
4 32. Prakesh S Shah, Shoo K Lee, Kei Lui, Gunnar Sjörs, Rintaro Mori, Brian Reichman,  
5  
6 et al and on behalf of the International Network for Evaluating Outcomes of Neonates  
7  
8 (iNeo). The International Network for Evaluating Outcomes of very low birth weight,  
9  
10 very preterm neonates (iNeo): a protocol for collaborative comparisons of international  
11  
12 health services for quality improvement in neonatal care. *BMC Pediatrics* 2014, 14:110  
13  
14 doi:10.1186/1471-2431-14-110  
15  
16  
17 33. Lui K, Lee SK, Kusuda S, Adams M, Vento M, Reichman B, Darlow BA, Lehtonen L,  
18  
19 Modi N, Norman M, Håkansson S, Bassler D, Rusconi F, Lodha A, Yang JM, Shah  
20  
21 PS, iNeo Investigators. Trends in neonatal outcomes for very preterm and very low  
22  
23 birth weight neonates in 11 countries. *J Pediatr* 2019;215:32–40.e14. DOI:  
24  
25 10.1016/j.jpeds.2019.08.020  
26  
27  
28 34. Lee SK, Aziz K, Singhal N, Cronin CM. The Evidence-based Practice for Improving  
29  
30 Quality method has greater impact on improvement of outcomes than dissemination of  
31  
32 practice change guidelines and quality improvement training in neonatal intensive care  
33  
34 units. *Paediatr Child Health*. 2015;20(1):e1-e9.  
35  
36  
37 35. Lee SK, Shah PS, Singhal N, et al. Association of a quality improvement program with  
38  
39 neonatal outcomes in extremely preterm infants: a prospective cohort study. *CMAJ*.  
40  
41 2014;186(13):E485 - E494. doi:10.1503/cmaj.140399  
42  
43  
44 36. Cronin CM, Baker GR, Lee SK, et al. Reflections on knowledge translation in Canadian  
45  
46 NICUs using the EPIQ method. *Healthc Q*. 2011;14 Spec No 3:8-16.  
47  
48 doi:10.12927/hcq.2011.22539  
49  
50  
51  
52  
53  
54  
55  
56  
57  
58  
59  
60

## Figure legend

### Figure 1. Map of 58 participating hospitals in Chinese Neonatal Network

There were 58 member hospitals from 25 provinces in China that are participating in the CHNN. The distribution of the 58 member hospitals is almost geographically throughout the mainland China.

## Word Count

3153 words

For peer review only

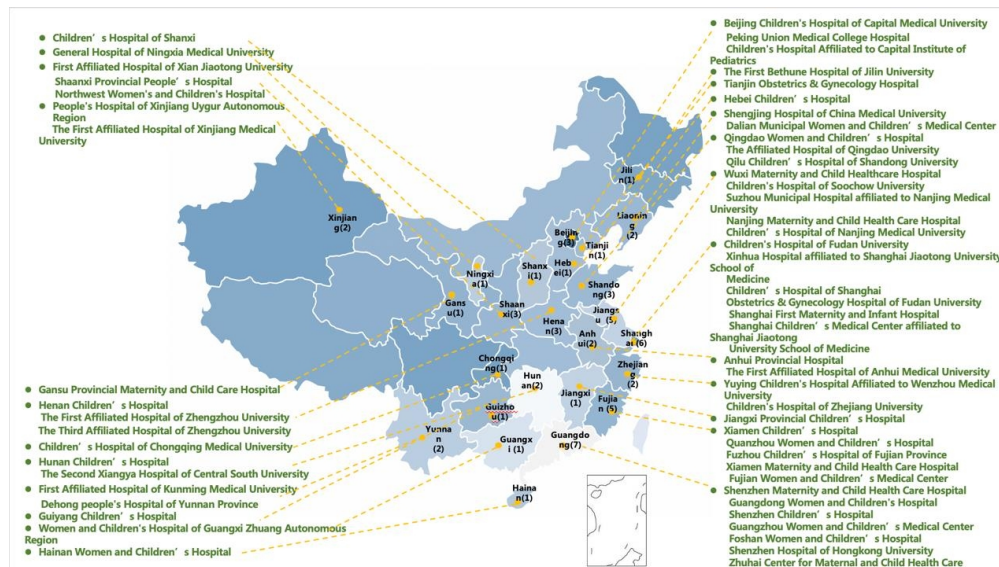

Figure 1. Map of 58 participating hospitals in Chinese Neonatal Network  
 There were 58 member hospitals from 25 provinces in China that are participating in the CHNN. The distribution of the 58 member hospitals is almost geographically throughout the mainland China.

146x82mm (220 x 220 DPI)
